# Supplementary material for: Gene prediction in novel fungal genomes using an ab initio algorithm with unsupervised training
Source: HighWire-hosted journal article supplement (doi:10.1101/gr.081612.108), 2008-08-29
Supplement: Figures_suplementary_FINAL.pdf [file Figures_suplementary_FINAL.pdf]

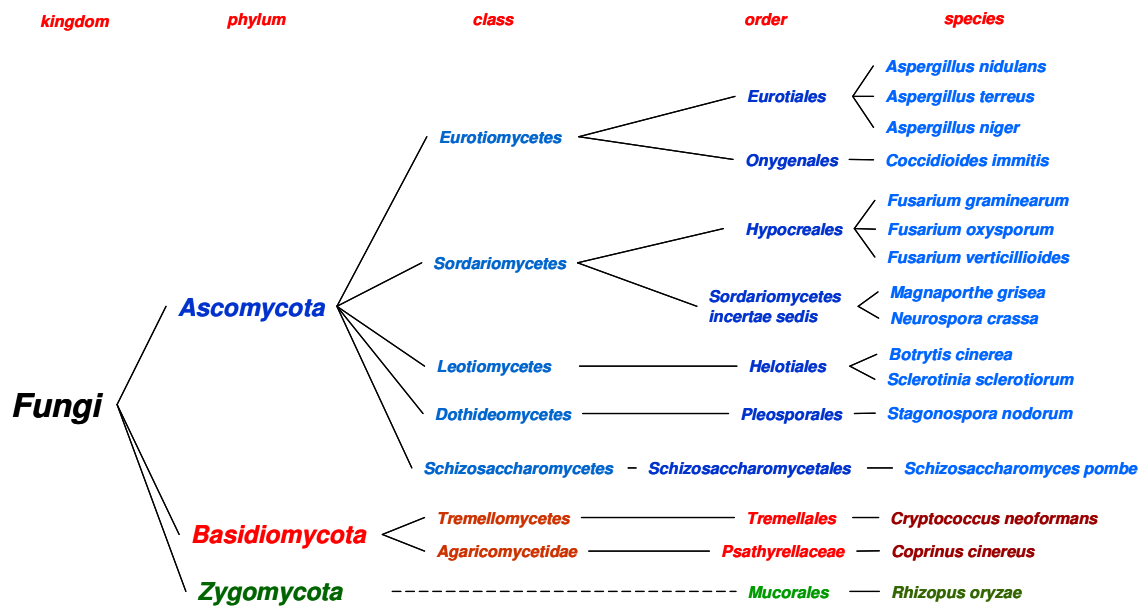

**Figure S1.** Taxonomic relationships of the fungal species under consideration ([www.ncbi.nlm.nih.gov/sites/entrez?db=taxonomy](http://www.ncbi.nlm.nih.gov/sites/entrez?db=taxonomy)).

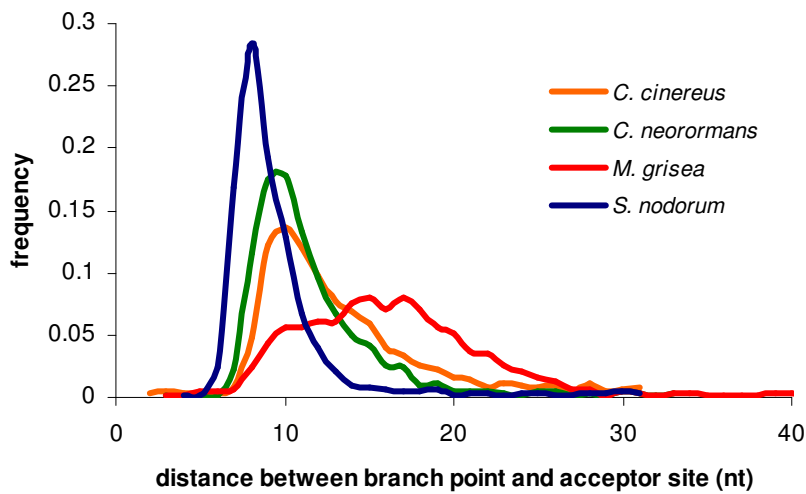

**Figure S2.** Length distributions of sequences between branch point and acceptor site determined for four fungal species at the final iteration of the algorithm.

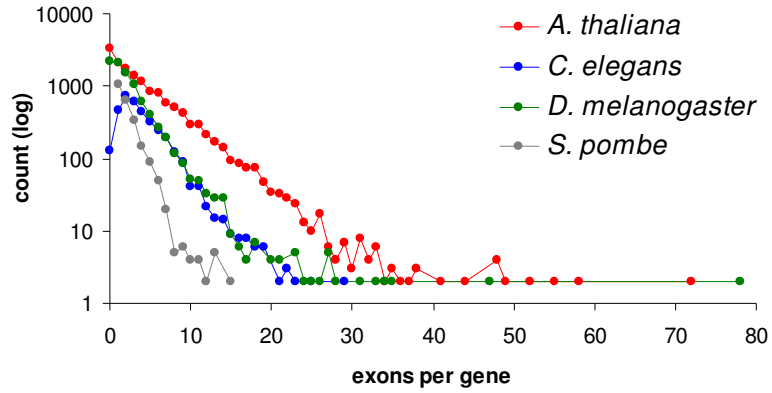

**Figure S3.** Counts of genes with a given number of exons per gene as calculated i/ from sets of genes confirmed by cDNA (*A. thaliana*, *C. elegans*); ii/ all annotated genes (*D. melanogaster*); iii/ a set of genes with protein product showing full length similarity to a protein in the SwissProt database (*S. pombe*).

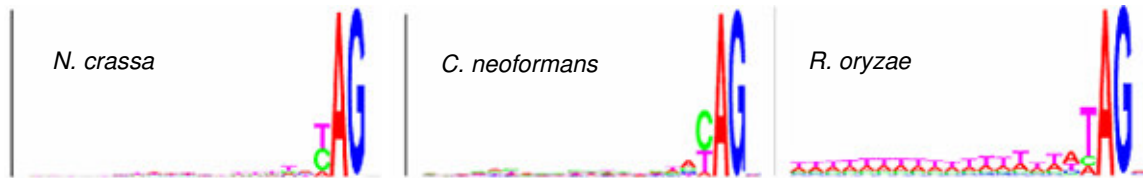

**Figure S4.** The logos of acceptor site models for *N. crassa* (Ascomycota), *C. neoformans* (Basidiomycota) and *R. oryzae* (Zygomycota). The models were derived from the sets of acceptors identified by EST genome alignments.

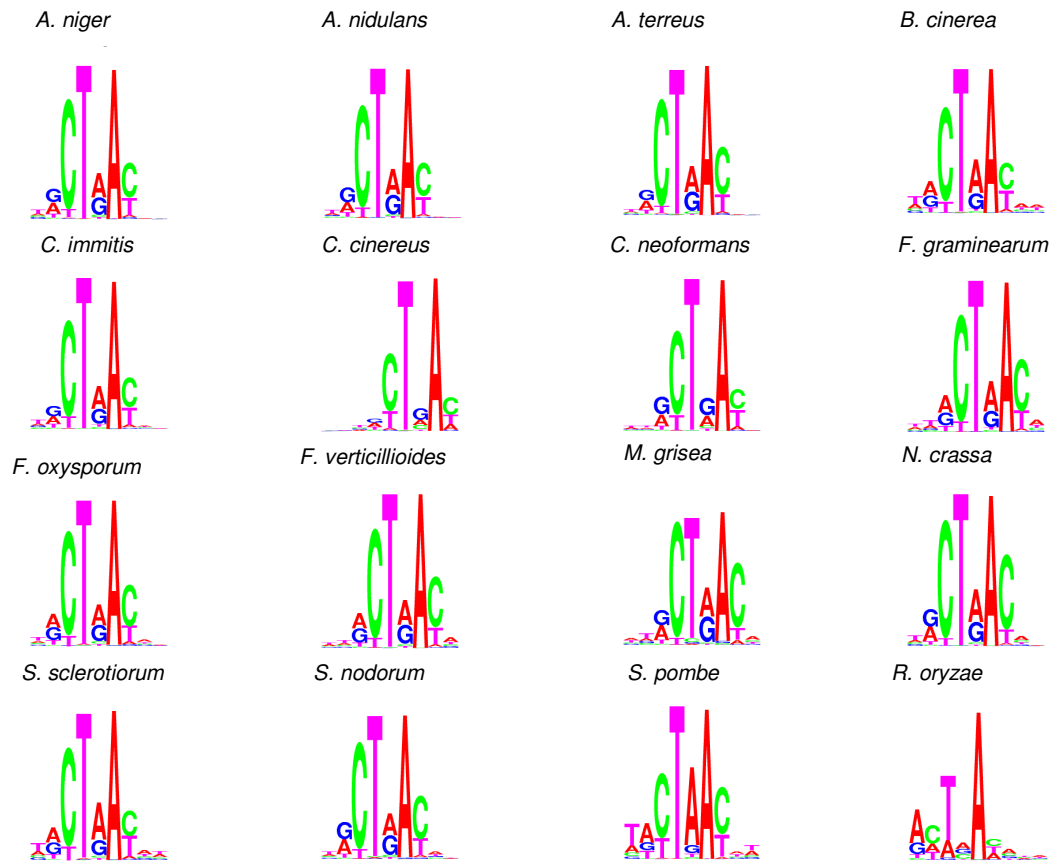

**Figure S5.** The logos of the zero order models of the branch point site for 16 fungal genomes as determined by the Gibbs sampling alignment of introns predicted at the algorithm convergence.

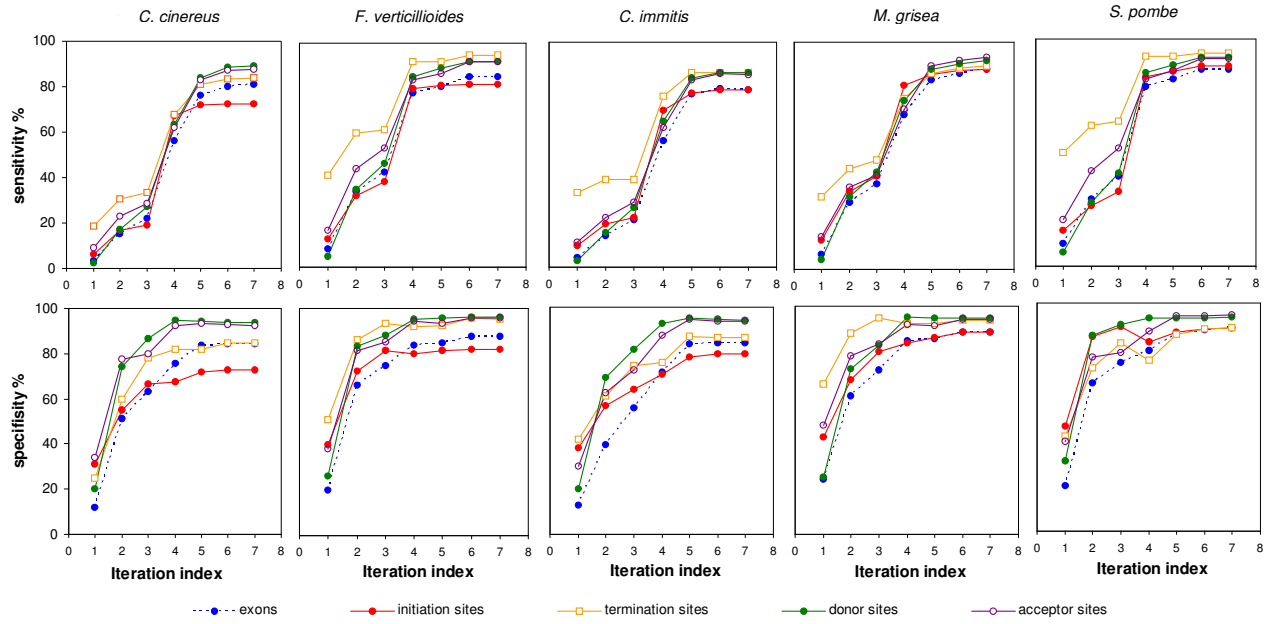

**Figure S6.** Changes in characteristics of prediction accuracy (Sn, Sp) of the exon-intron structures of genes from five fungal species are caused in subsequent iterations by the changes of the architecture and parameters of the HMM model underlying the gene prediction algorithm.

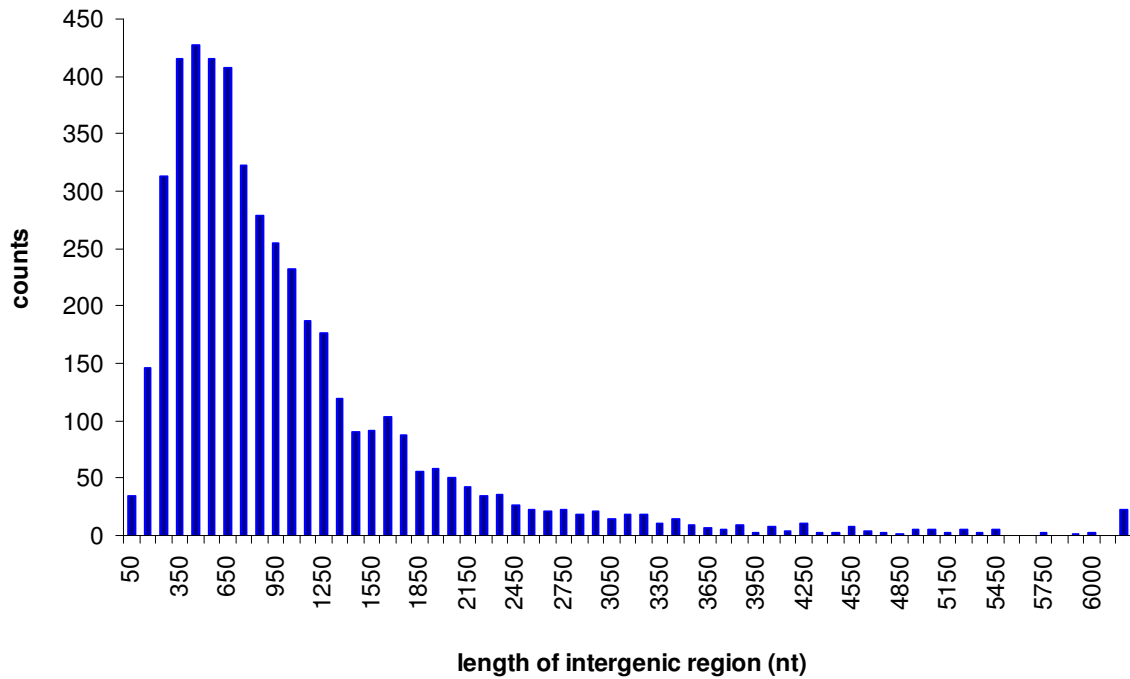

**Figure S7.** The length distribution of intergenic regions in the *S. pombe* genome (as annotated).

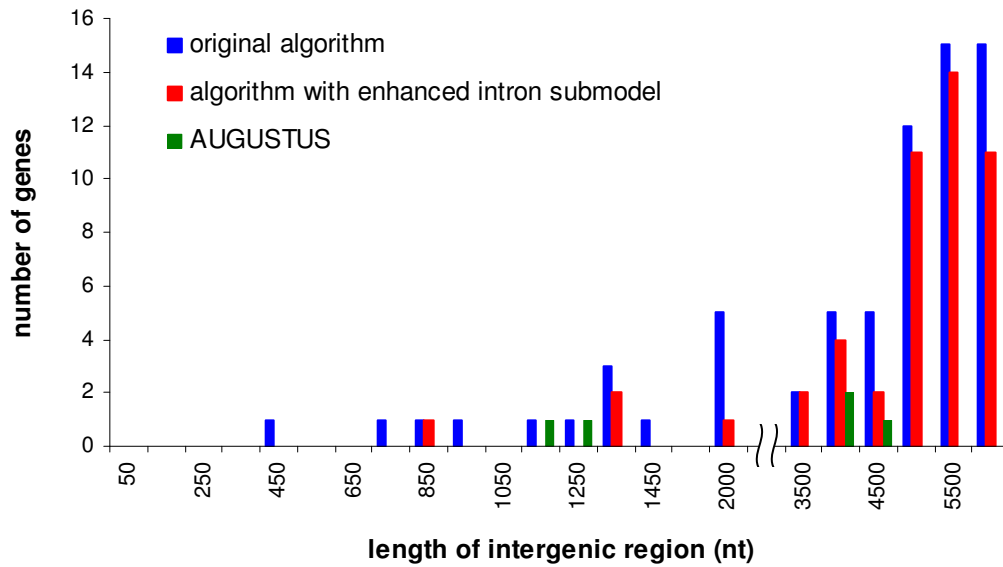

**Figure S8.** Number of genes erroneously predicted in 1276 intergenic regions of the *S. pombe* artificial chromosomes.

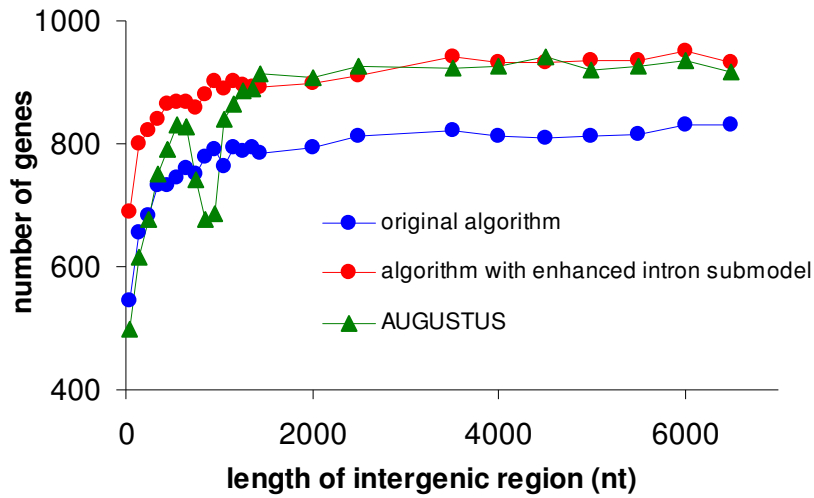

**Figure S9.** The number of exactly predicted genes in *S. pombe* artificial chromosomes (with 1277 genes) as a function of the length of intergenic region.

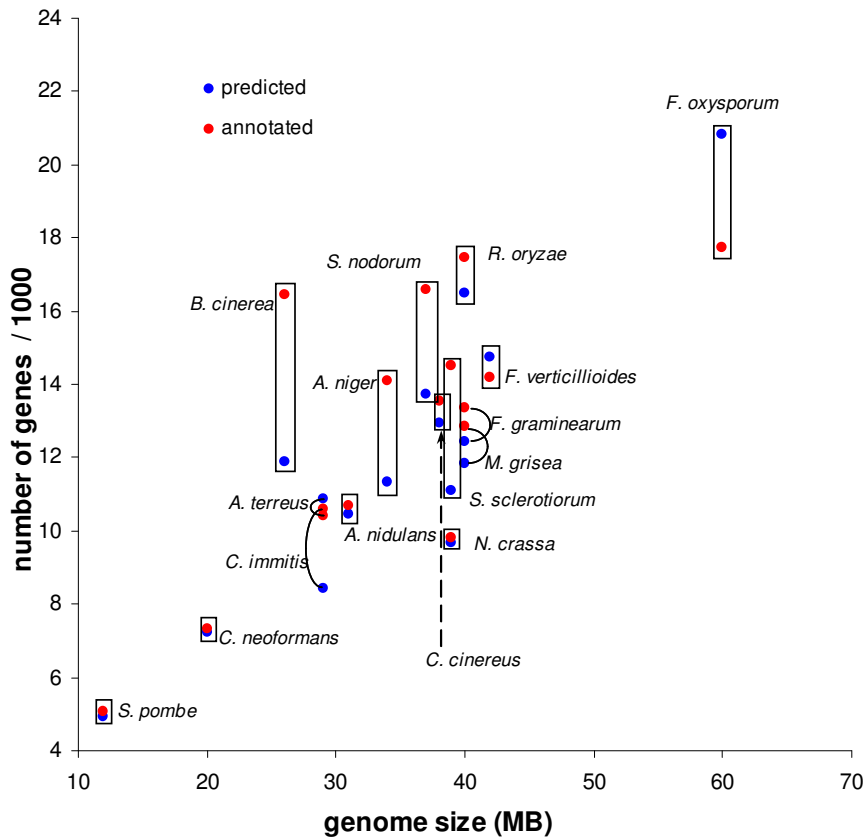

**Figure S10.** Numbers of predicted and annotated genes in the 16 fungal genomes. For some genomes (*B. cinerea*, *F. oxysporum*) the numbers of predicted and annotated genes are significantly different while for the others (*C. neoformans*, *N. crassa*, *S. pombe*, etc.) they are close to each other. The number of genes hosted per 1 MB of sequence varies from 250 to 430 genes per 1MB (*N. crassa* and *R. oryzae*, respectively).

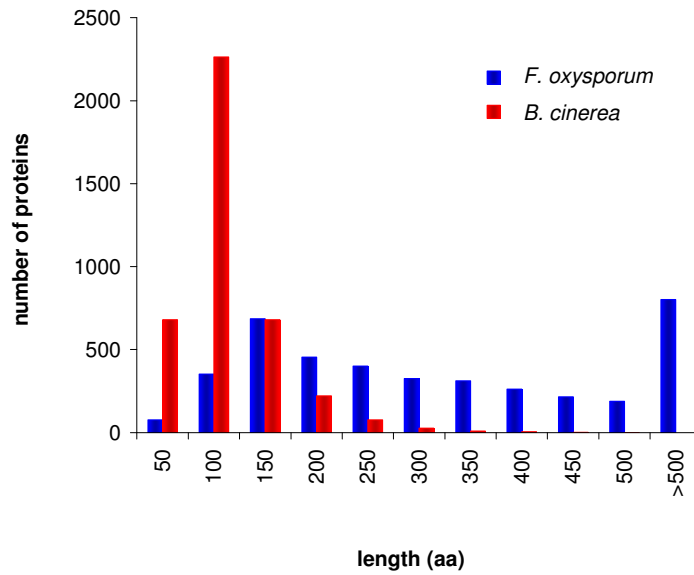

**Figure S11.** Length distributions of i/ the 4,558 genes annotated in *B. cinerea* genome that did not overlap with the predicted genes (red bars); ii/ the 3,108 genes predicted in *F. oxysporum* genome that did not overlap with the annotated genes (blue bars).

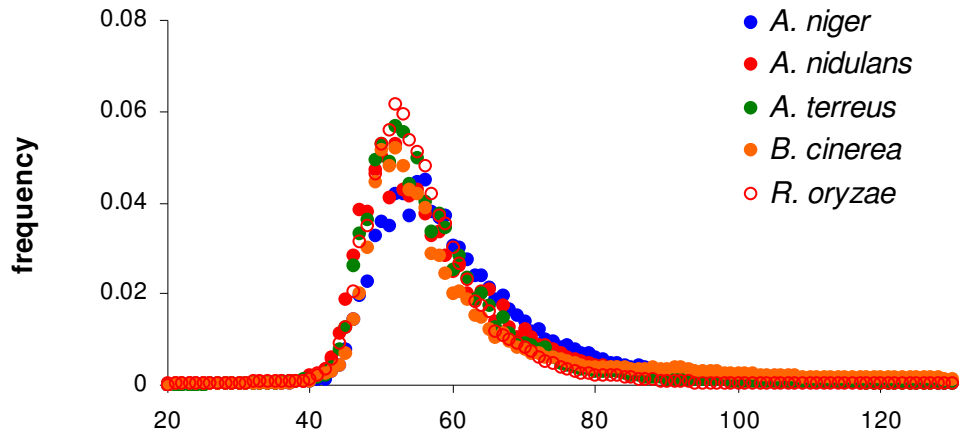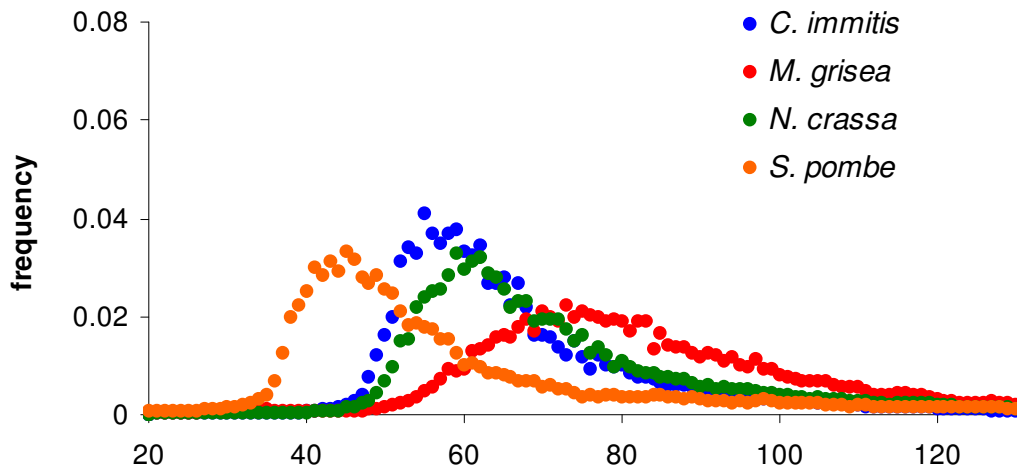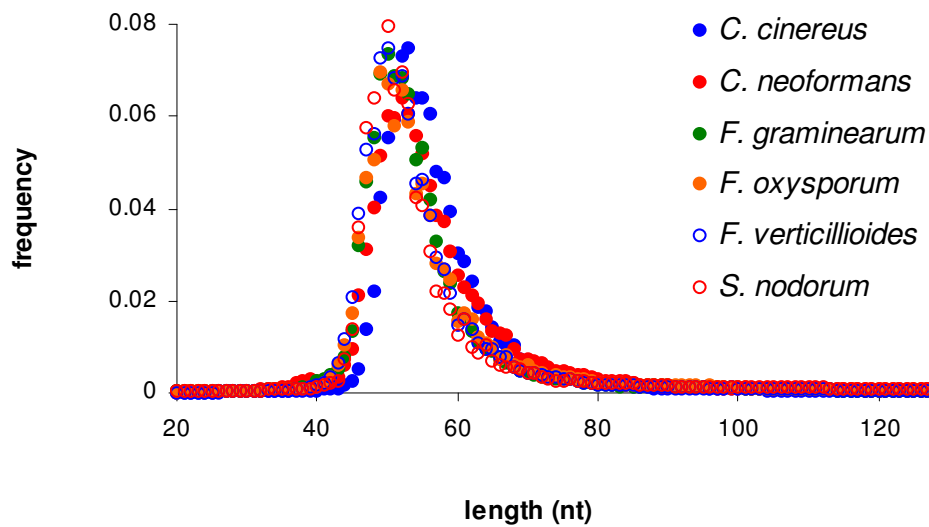

**Figure S12.** The intron length distributions as determined for the 16 fungal genomes.



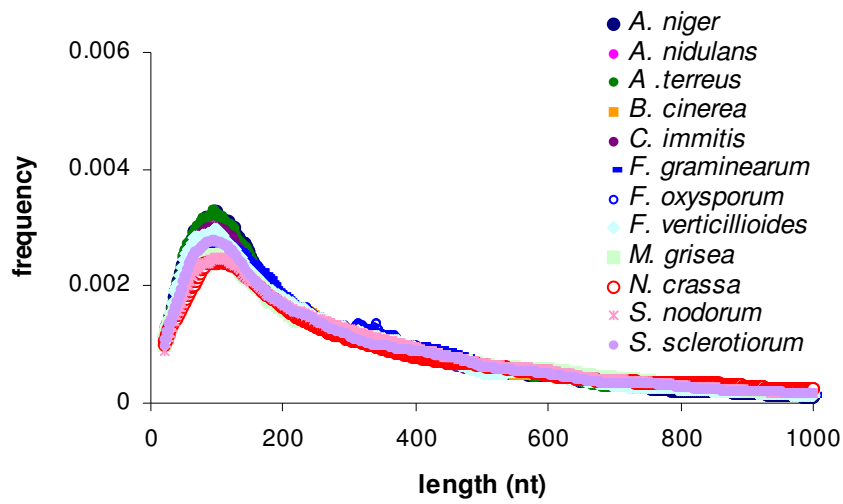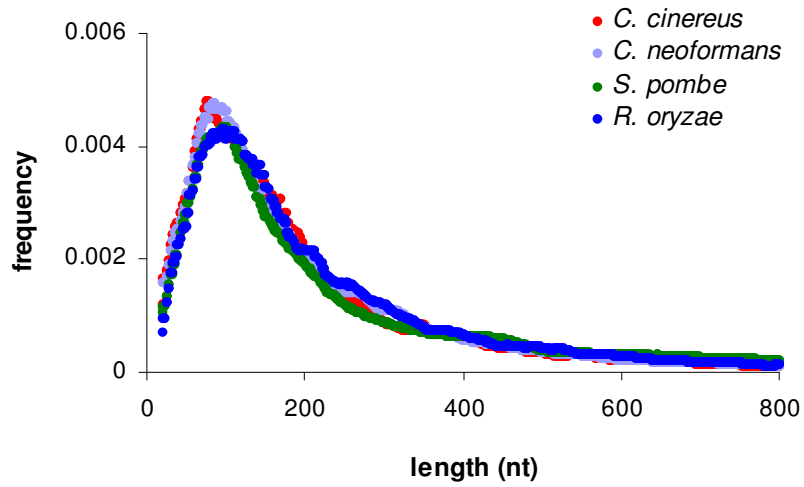

**Figure S13.** The exon length distributions as determined for the 16 fungal genomes.

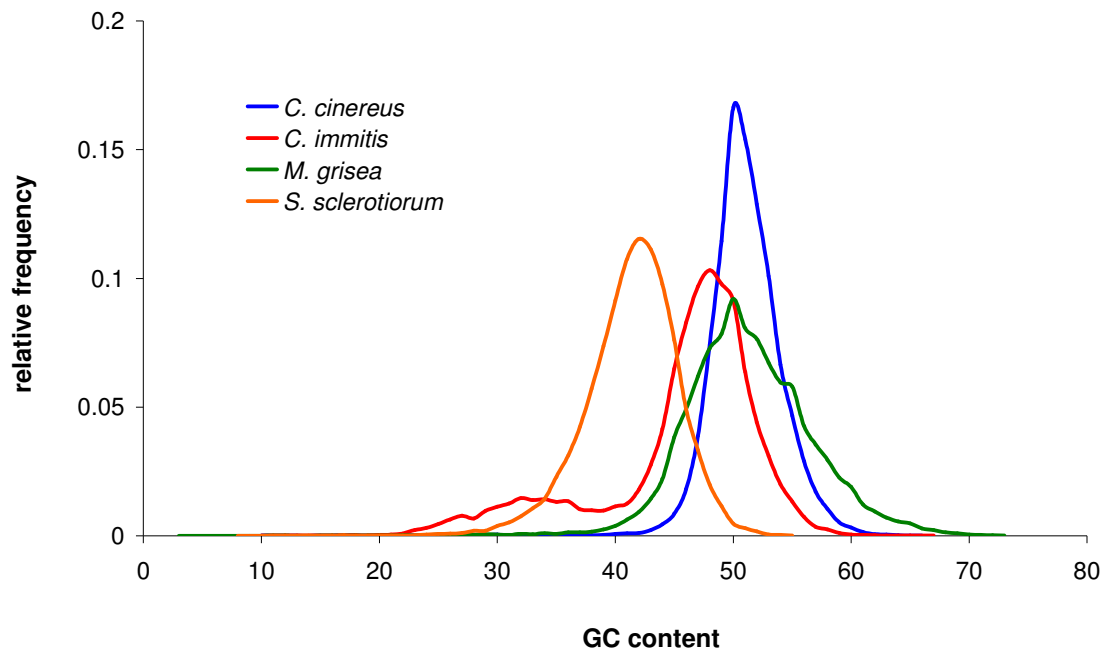

**Figure S14.** Distribution of genomic DNA GC content for the four fungal species (as determined in 1 kb long non-overlapping fragments).
