# Supplementary material for: Gene prediction in novel fungal genomes using an ab initio algorithm with unsupervised training
Source: HighWire-hosted journal article supplement (doi:10.1101/gr.081612.108), 2008-08-29
Supplement: Table_S9_final.pdf [file Table_S9_final.pdf]

**Table S9.** Newly predicted genes with functionally characterized protein products.

| Sequence ID and species name          | Gene_ID   | Fraction of aligned residues |           | Domain description                                                                 | Alignment E-value |
|---------------------------------------|-----------|------------------------------|-----------|------------------------------------------------------------------------------------|-------------------|
|                                       |           | in query                     | in target |                                                                                    |                   |
| chromosome_AM27098_Aspergillus_niger  | gene_7    | 0.97                         | 1.00      | gnl CDD 71315 pfam07876, Dabb, Stress responsive A/B Barrel Domain. The            | 6.00E-13          |
| chromosome_AM270981_Aspergillus_niger | gene_142  | 0.22                         | 0.96      | gnl CDD 68370 pfam04795, PAPA-1, PAPA-1-like conserved region.                     | 2.00E-07          |
| chromosome_AM270981_Aspergillus_niger | gene_594  | 0.99                         | 0.93      | 5' exoribonuclease                                                                 | 2.00E-47          |
| chromosome_AM270981_Aspergillus_niger | gene_607  | 0.51                         | 0.59      | gnl CDD 31007 COG0663, PaaY, Carbonic                                              | 2.00E-11          |
| chromosome_AM270981_Aspergillus_niger | gene_903  | 0.43                         | 0.95      | anhydrases/acetyltransferases, gnl CDD 32190 COG2007, RPS8A, Ribosomal protein S8E | 3.00E-18          |
| chromosome_AM270981_Aspergillus_niger | gene_1088 | 0.81                         | 1.00      | gnl CDD 72040 pfam08615, RNase_H1_sml, Ribonuclease H1 small subunit.              | 1.00E-29          |
| chromosome_AM270983_Aspergillus_niger | gene_222  | 0.33                         | 1.00      | gnl CDD 30606 COG0257, RpmJ, Ribosomal protein L36.                                | 3.00E-09          |
| chromosome_AM270983_Aspergillus_niger | gene_725  | 0.97                         | 1.00      | gnl CDD 31565 COG1374, NIP7, Protein involved in ribosomal biogenesis.             | 4.00E-39          |
| chromosome_AM270987_Aspergillus_niger | gene_241  | 0.58                         | 0.79      | gnl CDD 72409 pfam08991, DUF1903, Domain of unknown function (DUF1903).            | 1.00E-09          |
| chromosome_AM270987_Aspergillus_niger | gene_297  | 0.59                         | 0.80      | gnl CDD 69301 pfam05768, DUF836, Glutaredoxin-like domain (DUF836).                | 4.00E-07          |
| chromosome_AM270987_Aspergillus_niger | gene_318  | 0.87                         | 0.94      | gnl CDD 74917 PRK05395, PRK05395, 3-dehydroquinate dehydratase.                    | 7.00E-63          |

|                                       |          |      |      |                                                                              |          |
|---------------------------------------|----------|------|------|------------------------------------------------------------------------------|----------|
| chromosome_AM270987_Aspergillus_niger | gene_476 | 0.91 | 1.00 | gnl CDD 34019 COG4297, COG4297, Uncharacterized protein                      | 2.00E-21 |
| chromosome_AM270988_Aspergillus_niger | gene_464 | 0.60 | 0.94 | gnl CDD 71653 pfam08219, TOM13, Outer membrane protein TOM13.                | 1.00E-16 |
| chromosome_AM270990_Aspergillus_niger | gene_72  | 1.00 | 1.00 | gnl CDD 47816 smart00512, Skp1, Found in Skp1 protein family;                | 9.00E-12 |
| chromosome_AM270990_Aspergillus_niger | gene_135 | 0.70 | 0.87 | gnl CDD 68918 pfam05365, UCR_UQCRX_QCR9, Ubiquinol-cytochrome C reductase,   | 1.00E-10 |
| chromosome_AM270991_Aspergillus_niger | gene_332 | 0.95 | 1.00 | gnl CDD 68209 pfam04628, Sedlin_N, Sedlin, N-terminal conserved region.      | 3.00E-30 |
| chromosome_AM270991_Aspergillus_niger | gene_642 | 0.41 | 1.00 | gnl CDD 71661 pfam08227, DASH_Hsk3, DASH complex subunit Hsk3 like. The DASH | 3.00E-09 |
| chromosome_AM270993_Aspergillus_niger | gene_198 | 0.85 | 1.00 | gnl CDD 33491 COG3695, COG3695, Predicted methylated DNA-protein cysteine    | 3.00E-18 |
| chromosome_AM270993_Aspergillus_niger | gene_280 | 0.83 | 0.83 | gnl CDD 67778 pfam04178, Got1, Got1-like family.                             | 3.00E-15 |
| chromosome_AM270994_Aspergillus_niger | gene_11  | 0.52 | 0.92 | gnl CDD 71474 pfam08038, Tom7, TOM7 family.                                  | 3.00E-09 |
| chromosome_AM270994_Aspergillus_niger | gene_20  | 0.83 | 1.00 | gnl CDD 72555 pfam09138, Urm1, Urm1 (Ubiquitin related modifier).            | 2.00E-30 |
| chromosome_AM270996_Aspergillus_niger | gene_175 | 0.71 | 0.96 | gnl CDD 66614 pfam02953, zf-Tim10_DDP, Tim10/DDP family zinc finger.         | 2.00E-10 |
| chromosome_AM270996_Aspergillus_niger | gene_180 | 0.95 | 0.91 | gnl CDD 32119 COG1936, COG1936, Predicted nucleotide kinase                  | 2.00E-35 |

|                                       |          |      |      |                                                                                |          |
|---------------------------------------|----------|------|------|--------------------------------------------------------------------------------|----------|
| supercontig_1.1_of_botrytis_cinerea   | gene_4   | 0.95 | 0.67 | gnl CDD 69275 pfam05742, DUF833, Protein of unknown function (DUF833).         | 3.00E-26 |
| supercontig_1.26_of_botrytis_cinerea  | gene_1   | 0.75 | 1.00 | gnl CDD 58528 cd04413, NDPk_I, Nucleoside diphosphate kinase Group I           | 2.00E-62 |
| supercontig_1.32_of_botrytis_cinerea  | gene_53  | 0.83 | 1.00 | gnl CDD 31172 COG0830, UreF, Urease accessory protein UreF                     | 3.00E-22 |
| supercontig_1.46_of_botrytis_cinerea  | gene_1   | 0.65 | 0.75 | gnl CDD 29325 cd00250, CAS_like, Clavaminic acid synthetase (CAS) -like.       | 2.00E-09 |
| supercontig_1.49_of_botrytis_cinerea  | gene_12  | 0.89 | 1.00 | gnl CDD 33440 COG3642, COG3642, Mn2+-dependent serine/threonine protein kinase | 6.00E-54 |
| supercontig_1.54_of_botrytis_cinerea  | gene_8   | 1.00 | 1.00 | gnl CDD 79639 pfam00576, Transthyretin, Transthyretin precursor                | 1.00E-20 |
| supercontig_1.7_of_botrytis_cinerea   | gene_144 | 0.88 | 0.87 | gnl CDD 30229 cd02198, YjgH.                                                   | 2.00E-19 |
| supercontig_1.70_of_botrytis_cinerea  | gene_8   | 0.29 | 1.00 | gnl CDD 67744 pfam04140, ICMT, Isoprenylcysteine carboxyl methyltransferase    | 3.00E-19 |
| supercontig_1.73_of_botrytis_cinerea  | gene_13  | 0.39 | 0.58 | gnl CDD 30641 COG0293, FtsJ, 23S rRNA methylase.                               | 3.00E-19 |
| supercontig_1.1_of_botrytis_cinerea   | gene_147 | 0.34 | 1.00 | gnl CDD 71936 pfam08508, DUF1746, Fungal domain of unknown function (DUF1746). | 2.00E-28 |
| supercontig_1.100_of_botrytis_cinerea | gene_45  | 0.31 | 0.91 | gnl CDD 31133 COG0790, COG0790, FOG: TPR repeat, SEL1 subfamily.               | 2.00E-15 |
| supercontig_1.103_of_botrytis_cinerea | gene_6   | 0.69 | 0.79 | gnl CDD 29325 cd00250, CAS_like, Clavaminic acid synthetase (CAS) -like.       | 1.00E-10 |
| supercontig_1.103_of_botrytis_cinerea | gene_11  | 0.27 | 0.82 | gnl CDD 79643 pfam00583, Acetyltransf_1, Acetyltransferase (GNAT) family.      | 2.00E-07 |

|                                       |         |      |      |                                                                                |          |
|---------------------------------------|---------|------|------|--------------------------------------------------------------------------------|----------|
| supercontig_1.112_of_botrytis_cinerea | gene_36 | 0.40 | 0.98 | gnl CDD 70208 pfam06728, PIG-U, GPI transamidase subunit PIG-U.                | 7.00E-41 |
| supercontig_1.115_of_botrytis_cinerea | gene_14 | 0.43 | 1.00 | gnl CDD 71886 pfam08457, Sfi1, Sfi1 spindle body protein.                      | 1.00E-44 |
| supercontig_1.120_of_botrytis_cinerea | gene_5  | 0.96 | 0.82 | gnl CDD 70183 pfam06703, SPC25, Microsomal signal peptidase 25 kDa subunit     | 3.00E-22 |
| supercontig_1.120_of_botrytis_cinerea | gene_28 | 0.85 | 1.00 | gnl CDD 79991 pfam03155, Alg6_Alg8, ALG6, ALG8 glycosyltransferase family.     | e-102    |
| supercontig_1.123_of_botrytis_cinerea | gene_6  | 0.62 | 0.36 | gnl CDD 48039 cd03444, Thioesterase_II_repeat1.                                | 3.00E-09 |
| supercontig_1.124_of_botrytis_cinerea | gene_3  | 0.80 | 1.00 | gnl CDD 71474 pfam08038, Tom7, TOM7 family.                                    | 5.00E-10 |
| supercontig_1.132_of_botrytis_cinerea | gene_4  | 1.00 | 0.62 | gnl CDD 72075 pfam08650, DASH_Dad4, DASH complex subunit Dad4.                 | 6.00E-06 |
| supercontig_1.132_of_botrytis_cinerea | gene_6  | 0.82 | 0.82 | gnl CDD 67778 pfam04178, Got1, Got1-like family.                               | 2.00E-16 |
| supercontig_1.132_of_botrytis_cinerea | gene_17 | 0.89 | 0.96 | gnl CDD 29067 cd00148, PROF, Profilin binds actin monomers.                    | 3.00E-20 |
| supercontig_1.164_of_botrytis_cinerea | gene_12 | 0.98 | 1.00 | gnl CDD 79555 pfam00300, PGAM, Phosphoglycerate mutase family.                 | 6.00E-20 |
| supercontig_1.165_of_botrytis_cinerea | gene_2  | 0.37 | 0.66 | gnl CDD 29021 cd00266, MADS_SRF_like, SRF-like/Type I subfamily of MADS        | 4.00E-10 |
| supercontig_1.181_of_botrytis_cinerea | gene_10 | 0.80 | 0.99 | gnl CDD 67743 pfam04139, Rad9, Rad9. Rad9 is required for transient cell-cycle | 5.00E-25 |
| supercontig_1.14_of_botrytis_cinerea  | gene_15 | 0.89 | 0.75 | gnl CDD 30892 COG0546, Gph, Predicted phosphatases.                            | 6.00E-15 |
| supercontig_1.14_of_botrytis_cinerea  | gene_17 | 0.90 | 0.74 | gnl CDD 30892 COG0546, Gph, Predicted phosphatases.                            | 6.00E-15 |

|                                        |           |      |      |                                                                                 |          |
|----------------------------------------|-----------|------|------|---------------------------------------------------------------------------------|----------|
| supercontig_1.190_of_botrytis_cinerea  | gene_1    | 0.49 | 0.75 | gnl CDD 47665 smart00338, BRLZ, basic region leucin zipper.                     | 2.00E-08 |
| supercontig_1.16_of_botrytis_cinerea   | gene_14   | 0.92 | 0.94 | gnl CDD 32448 COG2267, PldB, Lysophospholipase [Lipid metabolism].              | 1.00E-34 |
| supercontig_1.18_of_botrytis_cinerea   | gene_3    | 0.82 | 1.00 | gnl CDD 74982 PRK05498, rplF, 50S ribosomal protein L6.                         | 4.00E-36 |
| supercontig_1.2_of_botrytis_cinerea    | gene_32   | 0.78 | 1.00 | gnl CDD 68096 pfam04511, DER1, Der1-like family. The endoplasmic reticulum (ER) | 5.00E-43 |
| supercontig_1.544_of_botrytis_cinerea  | gene_1    | 0.29 | 0.89 | gnl CDD 48003 smart00736, CADG, Dystroglycan-type cadherin-like domains.        | 4.00E-06 |
| supercontig_Coccidioides_immitis_RS2.1 | gene_469  | 0.70 | 0.65 | gnl CDD 74804 PRK05134, PRK05134, 3-demethylubiquinone-9 3-methyltransferase.   | 8.00E-22 |
| supercontig_Coccidioides_immitis_RS2.1 | gene_488  | 0.95 | 1.00 | gnl CDD 32448 COG2267, PldB, Lysophospholipase [Lipid metabolism].              | 1.00E-37 |
| supercontig_Coccidioides_immitis_RS2.1 | gene_508  | 0.60 | 0.76 | gnl CDD 71997 pfam08571, Yos1, Yos1-like.                                       | 3.00E-13 |
| supercontig_Coccidioides_immitis_RS2.1 | gene_609  | 0.17 | 1.00 | gnl CDD 47943 smart00668, CTLH, C-terminal to LisH motif. ; Alpha-helical motif | 2.00E-06 |
| supercontig_Coccidioides_immitis_RS2.1 | gene_1465 | 0.88 | 1.00 | gnl CDD 30620 COG0271, BoIA, Stress-induced morphogen (activity unknown)        | 2.00E-12 |
| supercontig_Coccidioides_immitis_RS2.1 | gene_1469 | 0.67 | 1.00 | gnl CDD 67724 pfam04119, HSP9_HSP12, Heat shock protein 9 / 12.                 | 1.00E-06 |
| supercontig_Coccidioides_immitis_RS2.1 | gene_1842 | 0.73 | 0.77 | gnl CDD 69216 pfam05680, ATP-synt_E, ATP synthase E chain.                      | 5.00E-14 |
| supercontig_Coccidioides_immitis_RS2.1 | gene_2157 | 0.79 | 1.00 | gnl CDD 71474 pfam08038, Tom7, TOM7 family.                                     | 2.00E-09 |

|                                        |           |      |      |                                                                                   |          |
|----------------------------------------|-----------|------|------|-----------------------------------------------------------------------------------|----------|
| supercontig_Coccidioides_immitis_RS2.2 | gene_166  | 0.74 | 0.38 | gnl CDD 76259 PRK07764, PRK07764, DNA polymerase III subunits gamma and tau.      | 6.00E-07 |
| supercontig_Coccidioides_immitis_RS2.2 | gene_585  | 0.31 | 1.00 | gnl CDD 28942 cd00060, FHA, Forkhead associated domain (FHA);                     | 1.00E-13 |
| supercontig_Coccidioides_immitis_RS2.2 | gene_1028 | 0.68 | 0.79 | gnl CDD 75062 PRK05649, PRK05649, 4-hydroxybenzoate octaprenyltransferase.        | 2.00E-47 |
| supercontig_Coccidioides_immitis_RS2.2 | gene_1568 | 0.68 | 1.00 | gnl CDD 66614 pfam02953, zf-Tim10_DDP, Tim10/DDP family zinc finger.              | 4.00E-12 |
| supercontig_Coccidioides_immitis_RS2.2 | gene_1731 | 0.60 | 0.94 | gnl CDD 58650 cd00926, Cyt_c_Oxidase_VIb, Cytochrome c oxidase subunit VIb.       | 3.00E-26 |
| supercontig_Coccidioides_immitis_RS2.2 | gene_1811 | 0.48 | 1.00 | gnl CDD 72056 pfam08631, SPO22, Sporulation protein SPO22 like.                   | 2.00E-45 |
| supercontig_Coccidioides_immitis_RS2.2 | gene_2059 | 0.85 | 1.00 | gnl CDD 31830 COG1644, RPB10, DNA-directed RNA polymerase, subunit N              | 3.00E-21 |
| supercontig_Coccidioides_immitis_RS2.3 | gene_219  | 0.21 | 0.87 | gnl CDD 48627 cd03078, GST_N_Metaxin1_like, GST_N family, Metaxin subfamily,      | 2.00E-11 |
| supercontig_Coccidioides_immitis_RS2.3 | gene_274  | 0.63 | 0.89 | gnl CDD 68638 pfam05071, NDUFA12, NADH ubiquinone oxidoreductase subunit NDUFA12. | 1.00E-12 |
| supercontig_Coccidioides_immitis_RS2.3 | gene_552  | 0.81 | 1.00 | gnl CDD 71726 pfam08293, Mit_rib_S27, Mitochondrial ribosomal subunit S27.        | 7.00E-17 |
| supercontig_Coccidioides_immitis_RS2.3 | gene_753  | 0.44 | 0.86 | gnl CDD 71653 pfam08219, TOM13, Outer membrane protein TOM13. The TOM13 family    | 5.00E-17 |

|                                                          |           |      |      |                                                                                   |          |
|----------------------------------------------------------|-----------|------|------|-----------------------------------------------------------------------------------|----------|
| supercontig_Coccidioides_immitis_RS2.3                   | gene_1041 | 1.00 | 0.98 | gnl CDD 29166 cd01763, Sumo, Small ubiquitin-related modifier (SUMO) proteins     | 1.00E-25 |
| supercontig_Coccidioides_immitis_RS2.3                   | gene_1157 | 0.85 | 0.99 | gnl CDD 65691 pfam01920, Prefoldin_2, Prefoldin subunit.                          | 3.00E-08 |
| supercontig_Coccidioides_immitis_RS2.3                   | gene_1351 | 0.90 | 0.94 | gnl CDD 34731 COG5130, YIP3, Prenylated rab acceptor 1 and related proteins       | 2.00E-39 |
| supercontig_Coccidioides_immitis_RS2.4                   | gene_95   | 0.90 | 1.00 | gnl CDD 29719 cd01732, LSm5, The eukaryotic Sm and Sm-like (LSm) proteins         | 2.00E-29 |
| supercontig_Coccidioides_immitis_RS2.4                   | gene_817  | 0.59 | 1.00 | gnl CDD 71021 pfam07574, SMC_Nse1, Nse1 non-SMC component of SMC5-6 complex.      | 2.00E-37 |
| supercontig_Coccidioides_immitis_RS2.4                   | gene_862  | 0.30 | 1.00 | gnl CDD 47687 smart00360, RRM, RNA recognition motif;                             | 3.00E-12 |
| supercontig_Coccidioides_immitis_RS2.5                   | gene_648  | 0.58 | 1.00 | gnl CDD 72775 pfam01900, RNase_P_Rpp14, Rpp14/Pop5 family. tRNA processing enzyme | 5.00E-13 |
| supercontig_2.6_of_Fusarium_oxysporum_f._sp._lycopersici | gene_149  | 0.39 | 1.00 | gnl CDD 71661 pfam08227, DASH_Hsk3, DASH complex subunit Hsk3 like.               | 1.00E-08 |
| supercontig_2.1_of_Fusarium_oxysporum_f._sp._lycopersici | gene_14   | 0.09 | 1.00 | gnl CDD 79619 pfam00520, lon_trans, lon transport protein.                        | 6.00E-20 |
| supercontig_2.1_of_Fusarium_oxysporum_f._sp._lycopersici | gene_130  | 0.36 | 1.00 | gnl CDD 64629 pfam00773, RNB, RNB domain.                                         | 8.00E-55 |
| supercontig_2.1_of_Fusarium_oxysporum_f._sp._lycopersici | gene_261  | 0.65 | 1.00 | gnl CDD 29029 cd00127, DSPc, Dual specificity phosphatases (DSP);                 | 1.00E-23 |
| supercontig_2.1_of_Fusarium_oxysporum_f._sp._lycopersici | gene_344  | 0.33 | 0.40 | gnl CDD 34840 COG5243, HRD1, HRD ubiquitin ligase complex, ER membrane component  | 8.00E-11 |
| supercontig_2.1_of_Fusarium_oxysporum_f._sp._lycopersici | gene_605  | 0.87 | 0.66 | gnl CDD 29481 cd00687, Terpene_cyclase_nonplant_C1, NonPlant Terpene Cyclases,    | 1.00E-13 |

|                                                           |          |      |      |                                                                                    |          |
|-----------------------------------------------------------|----------|------|------|------------------------------------------------------------------------------------|----------|
| supercontig_2.1_of_Fusarium_oxysporum_f._sp._lycopersici  | gene_751 | 0.58 | 0.44 | gnl CDD 76259 PRK07764,<br>PRK07764, DNA polymerase III<br>subunits gamma and tau. | 1.00E-06 |
| supercontig_2.1_of_Fusarium_oxysporum_f._sp._lycopersici  | gene_866 | 0.95 | 1.00 | gnl CDD 72346 pfam08927,<br>DUF1909, Domain of unknown<br>function (DUF1909).      | 1.00E-11 |
| supercontig_2.25_of_Fusarium_oxysporum_f._sp._lycopersici | gene_243 | 0.14 | 1.00 | gnl CDD 73154 cd01647,<br>RT_LTR, RT_LTR.                                          | 5.00E-68 |
| supercontig_2.26_of_Fusarium_oxysporum_f._sp._lycopersici | gene_218 | 0.22 | 0.92 | gnl CDD 67688 pfam04082,<br>Fungal_trans, Fungal specific<br>transcription factor  | 1.00E-09 |
| supercontig_2.26_of_Fusarium_oxysporum_f._sp._lycopersici | gene_229 | 0.66 | 0.77 | gnl CDD 32959 COG3145, AlkB,<br>Alkylated DNA repair protein.                      | 5.00E-09 |
| supercontig_2.26_of_Fusarium_oxysporum_f._sp._lycopersici | gene_312 | 0.40 | 0.96 | gnl CDD 28826 cd02164,<br>PPAT_CoAS.                                               | 3.00E-26 |
| supercontig_2.28_of_Fusarium_oxysporum_f._sp._lycopersici | gene_138 | 1.00 | 0.44 | gnl CDD 48392 cd02146,<br>NfsA_FRP.                                                | 1.00E-18 |
| supercontig_2.28_of_Fusarium_oxysporum_f._sp._lycopersici | gene_148 | 0.45 | 0.64 | gnl CDD 69235 pfam05699,<br>hATC, hAT family dimerisation<br>domain.               | 6.00E-07 |
| supercontig_2.28_of_Fusarium_oxysporum_f._sp._lycopersici | gene_1   | 0.33 | 0.71 | Integrase mediates                                                                 | 2.00E-11 |
| supercontig_2.30_of_Fusarium_oxysporum_f._sp._lycopersici | gene_104 | 1.00 | 0.44 | gnl CDD 48392 cd02146,<br>NfsA_FRP.                                                | 1.00E-18 |
| supercontig_2.30_of_Fusarium_oxysporum_f._sp._lycopersici | gene_114 | 0.45 | 0.64 | gnl CDD 69235 pfam05699,<br>hATC, hAT family dimerisation<br>domain.               | 6.00E-07 |
| supercontig_2.31_of_Fusarium_oxysporum_f._sp._lycopersici | gene_72  | 0.14 | 1.00 | gnl CDD 73154 cd01647,<br>RT_LTR, RT_LTR: Reverse<br>transcriptases (RTs)          | 5.00E-68 |
| supercontig_2.31_of_Fusarium_oxysporum_f._sp._lycopersici | gene_73  | 0.35 | 0.75 | gnl CDD 64525 pfam00665, rve,<br>Integrase core domain.                            | 4.00E-12 |
| supercontig_2.31_of_Fusarium_oxysporum_f._sp._lycopersici | gene_3   | 0.74 | 0.95 | gnl CDD 73154 cd01647,<br>RT_LTR, RT_LTR:                                          | 3.00E-44 |
| supercontig_2.4_of_Fusarium_oxysporum_f._sp._lycopersici  | gene_941 | 0.15 | 1.00 | gnl CDD 73154 cd01647,<br>RT_LTR, RT_LTR:                                          | 1.00E-67 |



|                                                           |          |      |      |                                                                         |                 |          |
|-----------------------------------------------------------|----------|------|------|-------------------------------------------------------------------------|-----------------|----------|
| supercontig_2.4_of_Fusarium_oxysporum_f._sp._lycopersici  | gene_947 | 0.86 | 1.00 | gnl CDD 30876<br>ECM27, Ca2+/Na+ antiporter                             | COG0530,        | 3.00E-20 |
| supercontig_2.36_of_Fusarium_oxysporum_f._sp._lycopersici | gene_1   | 0.18 | 1.00 | gnl CDD 73154<br>RT_LTR, RT_LTR                                         | cd01647,        | 1.00E-67 |
| supercontig_2.37_of_Fusarium_oxysporum_f._sp._lycopersici | gene_17  | 0.14 | 1.00 | gnl CDD 73154<br>RT_LTR, RT_LTR                                         | cd01647,        | 5.00E-68 |
| supercontig_2.38_of_Fusarium_oxysporum_f._sp._lycopersici | gene_15  | 0.14 | 1.00 | gnl CDD 73154<br>RT_LTR, RT_LTR                                         | cd01647,        | 5.00E-68 |
| supercontig_2.43_of_Fusarium_oxysporum_f._sp._lycopersici | gene_30  | 0.10 | 0.96 | gnl CDD 66556<br>MIZ, MIZ/SP-RING zinc finger.                          | pfam02891, zf-  | 3.00E-16 |
| supercontig_2.43_of_Fusarium_oxysporum_f._sp._lycopersici | gene_45  | 0.34 | 0.79 | gnl CDD 79449<br>RnaseH, RNase H.                                       | pfam00075,      | 2.00E-09 |
| supercontig_2.44_of_Fusarium_oxysporum_f._sp._lycopersici | gene_29  | 0.14 | 1.00 | gnl CDD 73154<br>RT_LTR, RT_LTR                                         | cd01647,        | 5.00E-68 |
| supercontig_2.45_of_Fusarium_oxysporum_f._sp._lycopersici | gene_45  | 0.14 | 1.00 | gnl CDD 73154<br>RT_LTR, RT_LTR                                         | cd01647,        | 5.00E-68 |
| supercontig_2.48_of_Fusarium_oxysporum_f._sp._lycopersici | gene_25  | 0.85 | 1.00 | gnl CDD 48039<br>Thioesterase_II_repeat1.                               | cd03444,        | 1.00E-15 |
| supercontig_2.5_of_Fusarium_oxysporum_f._sp._lycopersici  | gene_346 | 0.65 | 0.57 | gnl CDD 29142<br>Serine/Threonine protein kinases,<br>catalytic domain. | cd00180, S_TKc, | 2.00E-08 |
| supercontig_2.5_of_Fusarium_oxysporum_f._sp._lycopersici  | gene_426 | 0.84 | 1.00 | gnl CDD 69918<br>PRP1_N, PRP1 splicing factor, N-<br>terminal.          | pfam06424,      | 4.00E-32 |
| supercontig_2.5_of_Fusarium_oxysporum_f._sp._lycopersici  | gene_727 | 0.77 | 1.00 | gnl CDD 31294<br>RRP4, RNA-binding protein Rrp4<br>and related proteins | COG1097,        | 2.00E-40 |
| supercontig_2.54_of_Fusarium_oxysporum_f._sp._lycopersici | gene_2   | 0.30 | 0.94 | gnl CDD 64525<br>Integrase core domain.                                 | pfam00665, rve, | 5.00E-17 |
| supercontig_2.6_of_Fusarium_oxysporum_f._sp._lycopersici  | gene_337 | 0.55 | 0.79 | gnl CDD 69734<br>FRG1, FRG1-like family.                                | pfam06229,      | 8.00E-06 |
| supercontig_2.74_of_Fusarium_oxysporum_f._sp._lycopersici | gene_5   | 0.73 | 1.00 | gnl CDD 73154<br>RT_LTR, RT_LTR:                                        | cd01647,        | 1.00E-56 |
| supercontig_2.1_of_Fusarium_oxysporum_f._sp._lycopersici  | gene_68  | 0.95 | 0.96 | gnl CDD 34788<br>Putative transcriptional repressor<br>regulating G2/M  | COG5189, SFP1,  | 1.00E-31 |

|                                                           |          |      |      |                                                                                   |          |
|-----------------------------------------------------------|----------|------|------|-----------------------------------------------------------------------------------|----------|
| supercontig_2.96_of_Fusarium_oxysporum_f._sp._lycopersici | gene_2   | 0.66 | 0.56 | gnl CDD 32411 COG2230, Cfa, Cyclopropane fatty acid synthase and related          | 2.00E-11 |
| supercontig_2.8_of_Fusarium_oxysporum_f._sp._lycopersici  | gene_51  | 0.69 | 1.00 | gnl CDD 65608 pfam01826, TIL, Trypsin Inhibitor like cysteine rich domain.        | 5.00E-06 |
| supercontig_2.8_of_Fusarium_oxysporum_f._sp._lycopersici  | gene_219 | 0.82 | 0.95 | gnl CDD 79719 pfam00903, Glyoxalase, Glyoxalase/Bleomycin resistance              | 2.00E-06 |
| supercontig_2.8_of_Fusarium_oxysporum_f._sp._lycopersici  | gene_249 | 0.68 | 0.92 | gnl CDD 34729 COG5128, COG5128, Transport protein particle (TRAPP) complex        | 2.00E-46 |
| supercontig_2.8_of_Fusarium_oxysporum_f._sp._lycopersici  | gene_289 | 0.47 | 1.00 | gnl CDD 72017 pfam08592, DUF1772, Domain of unknown function (DUF1772).           | 1.00E-13 |
| supercontig_2.8_of_Fusarium_oxysporum_f._sp._lycopersici  | gene_510 | 0.90 | 0.87 | gnl CDD 67779 pfam04179, Init_tRNA_PT, Initiator tRNA phosphoribosyl transferase. | 1.00E-85 |
| supercontig_2.9_of_Fusarium_oxysporum_f._sp._lycopersici  | gene_4   | 0.20 | 0.98 | gnl CDD 64525 pfam00665, rve, Integrase core domain.                              | 2.00E-17 |
| supercontig_2.9_of_Fusarium_oxysporum_f._sp._lycopersici  | gene_57  | 0.31 | 0.93 | gnl CDD 47948 smart00674, CENPB, Putative DNA-binding domain in centromere        | 7.00E-06 |
| supercontig_2.9_of_Fusarium_oxysporum_f._sp._lycopersici  | gene_115 | 0.14 | 1.00 | gnl CDD 73154 cd01647, RT_LTR, RT_LTR                                             | 5.00E-68 |
| supercontig_2.9_of_Fusarium_oxysporum_f._sp._lycopersici  | gene_32  | 0.95 | 0.65 | gnl CDD 73491 PRK00102, rnc, ribonuclease III.                                    | 4.00E-07 |
| supercontig_2.2_of_Fusarium_oxysporum_f._sp._lycopersici  | gene_57  | 0.78 | 1.00 | gnl CDD 32694 COG2867, COG2867, Oligoketide cyclase/lipid transport protein       | 7.00E-26 |
| supercontig_2.2_of_Fusarium_oxysporum_f._sp._lycopersici  | gene_163 | 0.79 | 1.00 | gnl CDD 71474 pfam08038, Tom7, TOM7 family. This family consists of TOM7 family   | 5.00E-10 |

|                                                           |          |      |      |                                                                                   |          |
|-----------------------------------------------------------|----------|------|------|-----------------------------------------------------------------------------------|----------|
| supercontig_2.10_of_Fusarium_oxysporum_f._sp._lycopersici | gene_114 | 0.93 | 1.00 | gnl CDD 31782 COG1594, RPB9, DNA-directed RNA polymerase, subunit M/Transcription | 7.00E-14 |
| supercontig_2.10_of_Fusarium_oxysporum_f._sp._lycopersici | gene_554 | 0.14 | 1.00 | gnl CDD 73154 cd01647, RT_LTR, RT_LTR                                             | 5.00E-68 |
| supercontig_2.11_of_Fusarium_oxysporum_f._sp._lycopersici | gene_127 | 0.96 | 1.00 | gnl CDD 32441 COG2260, COG2260, Predicted Zn-ribbon RNA-binding protein           | 6.00E-10 |
| supercontig_2.11_of_Fusarium_oxysporum_f._sp._lycopersici | gene_95  | 1.00 | 1.00 | gnl CDD 71966 pfam08538, DUF1749, Protein of unknown function (DUF1749).          | 2.00E-71 |
| supercontig_2.11_of_Fusarium_oxysporum_f._sp._lycopersici | gene_190 | 0.98 | 1.00 | gnl CDD 30426 COG0077, PheA, Prephenate dehydratase                               | 7.00E-71 |
| supercontig_2.12_of_Fusarium_oxysporum_f._sp._lycopersici | gene_283 | 0.17 | 0.81 | gnl CDD 28964 cd00083, HLH, Helix-loop-helix domain                               | 3.00E-07 |
| supercontig_2.12_of_Fusarium_oxysporum_f._sp._lycopersici | gene_400 | 0.26 | 1.00 | gnl CDD 48037 cd03442, BFIT_BACH, Brown fat-inducible thioesterase (BFIT).        | 1.00E-20 |
| supercontig_2.2_of_Fusarium_oxysporum_f._sp._lycopersici  | gene_70  | 0.64 | 1.00 | gnl CDD 72839 pfam08583, UPF0287, Uncharacterised protein family (UPF0287).       | 1.00E-22 |
| supercontig_2.2_of_Fusarium_oxysporum_f._sp._lycopersici  | gene_363 | 0.91 | 1.00 | gnl CDD 29719 cd01732, LSm5, The eukaryotic Sm and Sm-like (LSm) proteins         | 3.00E-30 |
| supercontig_2.2_of_Fusarium_oxysporum_f._sp._lycopersici  | gene_812 | 0.94 | 1.00 | gnl CDD 33183 COG3376, HoxN, High-affinity nickel permease                        | 2.00E-78 |
| supercontig_2.2_of_Fusarium_oxysporum_f._sp._lycopersici  | gene_890 | 0.35 | 0.75 | gnl CDD 64525 pfam00665, rve, Integrase core domain.                              | 4.00E-12 |
| supercontig_2.2_of_Fusarium_oxysporum_f._sp._lycopersici  | gene_891 | 0.23 | 1.00 | gnl CDD 73154 cd01647, RT_LTR, RT_LTR                                             | 3.00E-67 |
| supercontig_2.14_of_Fusarium_oxysporum_f._sp._lycopersici | gene_44  | 0.14 | 1.00 | gnl CDD 73154 cd01647, RT_LTR, RT_LTR                                             | 5.00E-68 |
| supercontig_2.14_of_Fusarium_oxysporum_f._sp._lycopersici | gene_159 | 0.70 | 0.92 | gnl CDD 34746 COG5145, RAD14, DNA excision repair protein                         | 5.00E-50 |

|                                                           |          |      |      |                                                                                 |          |
|-----------------------------------------------------------|----------|------|------|---------------------------------------------------------------------------------|----------|
| supercontig_2.15_of_Fusarium_oxysporum_f._sp._lycopersici | gene_7   | 0.78 | 0.62 | gnl CDD 74518 PRK03983, PRK03983, exosome complex exonuclease Rrp41.            | 3.00E-11 |
| supercontig_2.15_of_Fusarium_oxysporum_f._sp._lycopersici | gene_100 | 0.62 | 0.96 | gnl CDD 69491 pfam05971, Methyltransf_10, Protein of unknown function (DUF890). | 2.00E-53 |
| supercontig_2.15_of_Fusarium_oxysporum_f._sp._lycopersici | gene_198 | 0.59 | 0.55 | gnl CDD 30614 COG0265, DegQ, Trypsin-like serine proteases,                     | 3.00E-07 |
| supercontig_2.15_of_Fusarium_oxysporum_f._sp._lycopersici | gene_289 | 0.61 | 1.00 | gnl CDD 47935 smart00659, RPOLCX, RNA polymerase subunit CX;                    | 2.00E-08 |
| supercontig_2.15_of_Fusarium_oxysporum_f._sp._lycopersici | gene_311 | 0.55 | 0.49 | gnl CDD 66174 pfam02458, Transferase, Transferase family.                       | 3.00E-15 |
| supercontig_2.17_of_Fusarium_oxysporum_f._sp._lycopersici | gene_54  | 0.97 | 1.00 | gnl CDD 72082 pfam08657, DASH_Spc34, DASH complex subunit Spc34.                | 5.00E-54 |
| supercontig_2.17_of_Fusarium_oxysporum_f._sp._lycopersici | gene_56  | 0.12 | 1.00 | gnl CDD 29102 cd00162, RING, RING-finger (Really Interesting New Gene) domain   | 3.00E-06 |
| supercontig_2.17_of_Fusarium_oxysporum_f._sp._lycopersici | gene_291 | 0.54 | 0.62 | gnl CDD 29841 cd00632, Prefoldin_beta, Prefoldin beta                           | 6.00E-06 |
| supercontig_2.18_of_Fusarium_oxysporum_f._sp._lycopersici | gene_29  | 0.49 | 0.50 | gnl CDD 79444 pfam00069, Pkinase, Protein kinase domain.                        | 5.00E-09 |
| supercontig_2.19_of_Fusarium_oxysporum_f._sp._lycopersici | gene_350 | 0.53 | 0.73 | gnl CDD 69043 pfam05498, RALF, Rapid ALkalinization Factor (RALF).              | 3.00E-13 |
| supercontig_2.20_of_Fusarium_oxysporum_f._sp._lycopersici | gene_180 | 0.76 | 0.55 | gnl CDD 69212 pfam05676, NDUF_B7, NADH-ubiquinone oxidoreductase B18 subunit    | 3.00E-11 |
| supercontig_2.20_of_Fusarium_oxysporum_f._sp._lycopersici | gene_251 | 0.23 | 1.00 | gnl CDD 48011 smart00744, RINGv, The RING-variant domain is a C4HC3 zinc-finger | 8.00E-07 |
| supercontig_2.21_of_Fusarium_oxysporum_f._sp._lycopersici | gene_11  | 0.49 | 0.50 | gnl CDD 79444 pfam00069, Pkinase, Protein kinase domain.                        | 5.00E-09 |

|                                                           |          |      |      |                                                                                   |          |
|-----------------------------------------------------------|----------|------|------|-----------------------------------------------------------------------------------|----------|
| supercontig_2.3_of_Fusarium_oxysporum_f._sp._lycopersici  | gene_35  | 0.89 | 0.93 | gnl CDD 66174 pfam02458, Transferase, Transferase family.                         | 4.00E-15 |
| supercontig_2.3_of_Fusarium_oxysporum_f._sp._lycopersici  | gene_98  | 0.92 | 0.98 | gnl CDD 31089 COG0746, MobA, Molybdopterin-guanine dinucleotide biosynthesis      | 4.00E-14 |
| supercontig_2.3_of_Fusarium_oxysporum_f._sp._lycopersici  | gene_422 | 0.64 | 0.43 | gnl CDD 30669 COG0321, LipB, Lipoate-protein ligase B [Coenzyme metabolism].      | 2.00E-14 |
| supercontig_2.3_of_Fusarium_oxysporum_f._sp._lycopersici  | gene_442 | 0.97 | 1.00 | gnl CDD 47853 smart00552, ADEAMc, tRNA-specific and double-stranded RNA adenosine | 1.00E-47 |
| supercontig_2.3_of_Fusarium_oxysporum_f._sp._lycopersici  | gene_455 | 0.50 | 1.00 | gnl CDD 71661 pfam08227, DASH_Hsk3, DASH complex subunit Hsk3 like.               | 2.00E-08 |
| supercontig_2.3_of_Fusarium_oxysporum_f._sp._lycopersici  | gene_515 | 0.96 | 1.00 | gnl CDD 69400 pfam05871, ESCRT-II, ESCRT-II complex subunit.                      | 9.00E-50 |
| supercontig_2.3_of_Fusarium_oxysporum_f._sp._lycopersici  | gene_654 | 0.74 | 1.00 | gnl CDD 31778 COG1590, COG1590, Uncharacterized conserved protein.                | 6.00E-24 |
| supercontig_2.22_of_Fusarium_oxysporum_f._sp._lycopersici | gene_49  | 0.14 | 1.00 | gnl CDD 73154 cd01647, RT_LTR, RT_LTR                                             | 5.00E-68 |
| supercontig_2.23_of_Fusarium_oxysporum_f._sp._lycopersici | gene_241 | 0.93 | 0.59 | gnl CDD 30949 COG0604, Qor, NADPH:quinone reductase and related Zn-dependent      | 1.00E-17 |
| supercontig_2.23_of_Fusarium_oxysporum_f._sp._lycopersici | gene_336 | 0.51 | 0.93 | gnl CDD 29261 cd00204, ANK, ankyrin repeats.                                      | 3.00E-08 |
| supercontig_2.24_of_Fusarium_oxysporum_f._sp._lycopersici | gene_60  | 0.59 | 1.00 | gnl CDD 47626 smart00298, CHROMO, Chromatin organization modifier domain.         | 6.00E-06 |
| Sclerotinia_sclerotiorum_supercontig_1.1                  | gene_495 | 0.70 | 0.90 | gnl CDD 68638 pfam05071, NDUFA12, NADH ubiquinone oxidoreductase subunit NDUFA12. | 5.00E-12 |
| Sclerotinia_sclerotiorum_supercontig_1.1                  | gene_748 | 0.63 | 0.94 | gnl CDD 47654 smart00326, SH3, Src homology 3 domains; Src homology 3 (SH3)       | 1.00E-09 |

|                                           |          |      |      |                                                                               |          |
|-------------------------------------------|----------|------|------|-------------------------------------------------------------------------------|----------|
| Sclerotinia_sclerotiorum_supercontig_1.10 | gene_123 | 0.42 | 0.80 | gnl CDD 30683 COG0335, RpIS, Ribosomal protein L19.                           | 9.00E-10 |
| Sclerotinia_sclerotiorum_supercontig_1.10 | gene_132 | 0.59 | 1.00 | gnl CDD 69040 pfam05495, zf-CHY, CHY zinc finger.                             | 2.00E-09 |
| Sclerotinia_sclerotiorum_supercontig_1.11 | gene_143 | 0.72 | 1.00 | gnl CDD 72881 cd02885, IPP_Isomerase, Isopentenyl diphosphate (IPP).          | 2.00E-60 |
| Sclerotinia_sclerotiorum_supercontig_1.11 | gene_375 | 0.63 | 0.87 | gnl CDD 75796 PRK06849, PRK06849, hypothetical protein.                       | 2.00E-35 |
| Sclerotinia_sclerotiorum_supercontig_1.11 | gene_399 | 0.96 | 1.00 | gnl CDD 34679 COG5075, COG5075, Uncharacterized conserved protein.            | 9.00E-62 |
| Sclerotinia_sclerotiorum_supercontig_1.12 | gene_320 | 0.57 | 0.97 | gnl CDD 71474 pfam08038, Tom7, TOM7 family.                                   | 2.00E-09 |
| Sclerotinia_sclerotiorum_supercontig_1.14 | gene_110 | 0.62 | 1.00 | gnl CDD 31588 COG1398, OLE1, Fatty-acid desaturase [Lipid metabolism].        | 3.00E-76 |
| Sclerotinia_sclerotiorum_supercontig_1.18 | gene_98  | 0.65 | 1.00 | gnl CDD 29952 cd00959, DeoC, 2-deoxyribose-5-phosphate aldolase (DERA) of the | 1.00E-40 |
| Sclerotinia_sclerotiorum_supercontig_1.2  | gene_526 | 0.34 | 1.00 | gnl CDD 29697 cd00593, RIBOc, RIBOc. Ribonuclease III C terminal domain.      | 4.00E-21 |
| Sclerotinia_sclerotiorum_supercontig_1.20 | gene_57  | 0.61 | 0.34 | gnl CDD 65423 pfam01624, MutS_I, MutS domain I.                               | 2.00E-08 |
| Sclerotinia_sclerotiorum_supercontig_1.22 | gene_154 | 0.58 | 0.40 | gnl CDD 69613 pfam06101, DUF946, Plant protein of unknown function (DUF946).  | 6.00E-10 |
| Sclerotinia_sclerotiorum_supercontig_1.26 | gene_15  | 0.29 | 1.00 | gnl CDD 67744 pfam04140, ICMT, Isoprenylcysteine carboxyl methyltransferase   | 2.00E-19 |
| Sclerotinia_sclerotiorum_supercontig_1.31 | gene_24  | 0.66 | 1.00 | gnl CDD 67469 pfam03856, SUN, Beta-glucosidase (SUN family).                  | 4.00E-53 |

|                                          |          |      |      |                                                                              |          |
|------------------------------------------|----------|------|------|------------------------------------------------------------------------------|----------|
| Sclerotinia_sclerotiorum_supercontig_1.5 | gene_309 | 0.40 | 0.98 | gnl CDD 70208 pfam06728, PIG-U, GPI transamidase subunit PIG-U.              | 1.00E-40 |
| Sclerotinia_sclerotiorum_supercontig_1.8 | gene_263 | 0.79 | 1.00 | gnl CDD 69301 pfam05768, DUF836, Glutaredoxin-like domain (DUF836).          | 5.00E-06 |
| Phaeosphaeria_nodorum_supercontig_1.33   | gene_13  | 0.82 | 1.00 | gnl CDD 80120 pfam05721, PhyH, Phytanoyl-CoA dioxygenase (PhyH).             | 4.00E-28 |
| Phaeosphaeria_nodorum_supercontig_1.10   | gene_5   | 0.74 | 1.00 | gnl CDD 29709 cd01722, Sm_F, The eukaryotic Sm and Sm-like (LSm) proteins    | 6.00E-25 |
| Phaeosphaeria_nodorum_supercontig_1.6    | gene_132 | 0.64 | 0.80 | gnl CDD 71997 pfam08571, Yos1, Yos1-like. In yeast, Yos1 is a subunit of the | 1.00E-16 |
| Phaeosphaeria_nodorum_supercontig_1.7    | gene_201 | 0.63 | 0.85 | gnl CDD 68195 pfam04614, Pex19, Pex19 protein family.                        | 9.00E-20 |
| supercontig_3.1_of_Fusarium_graminearum  | gene_131 | 0.40 | 1.00 | gnl CDD 29261 cd00204, ANK, ankyrin repeats;                                 | 7.00E-10 |
| supercontig_3.1_of_Fusarium_graminearum  | gene_321 | 0.35 | 0.31 | gnl CDD 79137 PRK12678, PRK12678, transcription termination factor Rho.      | 1.00E-07 |
| supercontig_3.4_of_Fusarium_graminearum  | gene_334 | 0.32 | 0.37 | gnl CDD 77212 PRK09510, tolA, cell envelope integrity inner membrane protein | 9.00E-06 |
| supercontig_3.4_of_Fusarium_graminearum  | gene_698 | 0.97 | 1.00 | gnl CDD 72839 pfam08583, UPF0287, Uncharacterised protein family (UPF0287).  | 1.00E-17 |
| supercontig_3.4_of_Fusarium_graminearum  | gene_756 | 0.45 | 1.00 | gnl CDD 65057 pfam01230, HIT, HIT domain.                                    | 6.00E-07 |
| supercontig_3.4_of_Fusarium_graminearum  | gene_852 | 0.29 | 0.98 | gnl CDD 65933 pfam02194, PXA, PXA domain. This domain is associated with PX  | 1.00E-11 |
| supercontig_3.4_of_Fusarium_graminearum  | gene_904 | 0.62 | 0.92 | gnl CDD 79664 pfam00639, Rotamase, PPIC-type PPIASE domain.                  | 5.00E-11 |

|                                         |           |      |      |                                                                                   |          |
|-----------------------------------------|-----------|------|------|-----------------------------------------------------------------------------------|----------|
| supercontig_3.4_of_Fusarium_graminearum | gene_1192 | 0.65 | 0.77 | gnl CDD 32959 COG3145, AlkB, Alkylated DNA repair protein [DNA replication,       | 8.00E-09 |
| supercontig_3.5_of_Fusarium_graminearum | gene_343  | 0.23 | 1.00 | gnl CDD 70445 pfam06978, POP1, Ribonucleases P/MRP protein subunit POP1.          | 2.00E-16 |
| supercontig_3.6_of_Fusarium_graminearum | gene_214  | 0.23 | 0.95 | gnl CDD 79643 pfam00583, Acetyltransf_1, Acetyltransferase (GNAT) family.         | 4.00E-07 |
| supercontig_3.6_of_Fusarium_graminearum | gene_367  | 0.22 | 0.98 | gnl CDD 79450 pfam00076, RRM_1, RNA recognition motif. (a.k.a. RRM, RBD, or RNP   | 3.00E-10 |
| supercontig_3.1_of_Fusarium_graminearum | gene_733  | 0.82 | 1.00 | gnl CDD 69301 pfam05768, DUF836, Glutaredoxin-like domain (DUF836).               | 2.00E-09 |
| supercontig_3.1_of_Fusarium_graminearum | gene_1030 | 0.79 | 0.56 | gnl CDD 34793 COG5194, APC11, Component of SCF ubiquitin ligase                   | 2.00E-08 |
| supercontig_3.6_of_Fusarium_graminearum | gene_347  | 0.84 | 1.00 | gnl CDD 31782 COG1594, RPB9, DNA-directed RNA polymerase, subunit M/Transcription | 1.00E-13 |
| supercontig_3.7_of_Fusarium_graminearum | gene_99   | 0.79 | 1.00 | gnl CDD 31294 COG1097, RRP4, RNA-binding protein Rrp4 and related proteins        | 1.00E-40 |
| supercontig_3.1_of_Fusarium_graminearum | gene_37   | 0.83 | 0.95 | gnl CDD 30036 cd01293, Bact_CD, Bacterial cytosine deaminase                      | 1.00E-48 |
| supercontig_3.1_of_Fusarium_graminearum | gene_85   | 0.67 | 0.76 | gnl CDD 72809 pfam05493, ATP_synt_H, ATP synthase subunit H.                      | 2.00E-06 |
| supercontig_3.1_of_Fusarium_graminearum | gene_155  | 0.31 | 1.00 | gnl CDD 29261 cd00204, ANK, ankyrin repeats;                                      | 4.00E-12 |
| supercontig_3.2_of_Fusarium_graminearum | gene_379  | 0.86 | 1.00 | gnl CDD 72162 pfam08738, Gon7, Gon7 family.                                       | 1.00E-09 |



|                                            |          |      |      |                                                                      |                          |          |
|--------------------------------------------|----------|------|------|----------------------------------------------------------------------|--------------------------|----------|
| supercontig_3.3_of_Fusarium_graminearum    | gene_654 | 0.70 | 1.00 | gnl CDD 72775<br>RNase_P_Rpp14,<br>family.                           | pfam01900,<br>Rpp14/Pop5 | 3.00E-14 |
| supercontig_3.3_of_Fusarium_graminearum    | gene_670 | 0.59 | 1.00 | gnl CDD 71719<br>Spc24, Spc24 subunit of Ndc80.                      | pfam08286,               | 5.00E-26 |
| supercontig_3.3_of_Fusarium_graminearum    | gene_50  | 0.78 | 0.93 | gnl CDD 28942<br>Forkhead associated domain<br>(FHA);                | cd00060, FHA,            | 7.00E-10 |
| supercontig_3.3_of_Fusarium_graminearum    | gene_239 | 0.40 | 1.00 | gnl CDD 71675<br>Methyltransf_11,<br>Methyltransferase domain.       | pfam08241,               | 7.00E-11 |
| Magnaporthe_grisea_70-15_supercontig_5.134 | gene_29  | 0.47 | 1.00 | gnl CDD 71198<br>DUF1613, Protein of unknown<br>function (DUF1613).  | pfam07757,               | 4.00E-76 |
| Magnaporthe_grisea_70-15_supercontig_5.134 | gene_58  | 0.42 | 0.97 | gnl CDD 79702<br>PX domain. PX domains bind to<br>phosphoinositides. | pfam00787, PX,           | 2.00E-17 |
| Magnaporthe_grisea_70-15_supercontig_5.134 | gene_167 | 0.97 | 0.82 | gnl CDD 30800<br>WcaG, Nucleoside-diphosphate-<br>sugar epimerases   | COG0451,                 | 4.00E-07 |
| Magnaporthe_grisea_70-15_supercontig_5.134 | gene_168 | 0.50 | 0.76 | gnl CDD 70740<br>DUF1446, Protein of unknown<br>function (DUF1446).  | pfam07287,               | 2.00E-52 |
| Magnaporthe_grisea_70-15_supercontig_5.134 | gene_186 | 0.37 | 0.82 | gnl CDD 71939<br>COQ9, COQ9.                                         | pfam08511,               | 2.00E-20 |
| Magnaporthe_grisea_70-15_supercontig_5.178 | gene_119 | 0.65 | 1.00 | gnl CDD 72775<br>RNase_P_Rpp14,<br>family.                           | pfam01900,<br>Rpp14/Pop5 | 8.00E-15 |
| Magnaporthe_grisea_70-15_supercontig_5.186 | gene_45  | 0.56 | 0.36 | gnl CDD 76117<br>PRK07479,<br>3-ketoacyl-(acyl-<br>carrier-protein)  | PRK07479,                | 1.00E-11 |
| Magnaporthe_grisea_70-15_supercontig_5.187 | gene_111 | 0.87 | 0.99 | gnl CDD 31215<br>COG1011, Predicted hydrolase<br>(HAD superfamily)   | COG1011,                 | 2.00E-11 |

|                                            |          |      |      |                                                                                  |          |
|--------------------------------------------|----------|------|------|----------------------------------------------------------------------------------|----------|
| Magnaporthe_grisea_70-15_supercontig_5.187 | gene_85  | 0.72 | 0.56 | gnl CDD 32715 COG2890, HemK, Methylase of polypeptide chain release factors      | 2.00E-09 |
| Magnaporthe_grisea_70-15_supercontig_5.190 | gene_81  | 0.90 | 0.88 | gnl CDD 35095 COG5536, BET4, Protein prenyltransferase, alpha subunit            | 1.00E-28 |
| Magnaporthe_grisea_70-15_supercontig_5.190 | gene_266 | 0.97 | 0.93 | gnl CDD 30426 COG0077, PheA, Prephenate dehydratase                              | 4.00E-58 |
| Magnaporthe_grisea_70-15_supercontig_5.191 | gene_38  | 0.76 | 1.00 | gnl CDD 64803 pfam00955, HCO3_cotransp, HCO3-transporter family.                 | 1.00E-52 |
| Magnaporthe_grisea_70-15_supercontig_5.194 | gene_6   | 0.63 | 1.00 | gnl CDD 31137 COG0794, GutQ, Predicted sugar phosphate isomerase involved in     | 3.00E-24 |
| Magnaporthe_grisea_70-15_supercontig_5.194 | gene_68  | 0.95 | 0.75 | gnl CDD 48573 cd03024, DsbA_FrnE, DsbA family, FrnE subfamily.                   | 4.00E-18 |
| Magnaporthe_grisea_70-15_supercontig_5.194 | gene_68  | 0.63 | 0.97 | gnl CDD 66296 pfam02594, DUF167, Uncharacterised ACR, YggU family COG1872.       | 2.00E-09 |
| Magnaporthe_grisea_70-15_supercontig_5.194 | gene_616 | 0.57 | 0.87 | gnl CDD 74772 PRK05014, hscB, co-chaperone HscB.                                 | 3.00E-11 |
| Magnaporthe_grisea_70-15_supercontig_5.194 | gene_54  | 0.56 | 0.97 | gnl CDD 29621 cd00520, RRF, Ribosome recycling factor (RRF).                     | 1.00E-08 |
| Magnaporthe_grisea_70-15_supercontig_5.195 | gene_12  | 0.90 | 1.00 | gnl CDD 29648 cd00563, Dtyr_deacylase, D-Tyrosyl-tRNA <sup>tyr</sup> deacylases. | 6.00E-46 |
| Magnaporthe_grisea_70-15_supercontig_5.195 | gene_75  | 0.83 | 0.90 | gnl CDD 75144 PRK05766, rps14P, 30S ribosomal protein S14P.                      | 3.00E-09 |
| Magnaporthe_grisea_70-15_supercontig_5.195 | gene_144 | 0.59 | 0.81 | gnl CDD 72817 pfam06331, Tbf5, Transcription factor TFIIH complex subunit Tfb5.  | 6.00E-10 |

|                                                                                              |          |      |      |                                                                             |          |
|----------------------------------------------------------------------------------------------|----------|------|------|-----------------------------------------------------------------------------|----------|
| Magnaporthe_grisea_70-15_supercontig_5.196                                                   | gene_20  | 1.00 | 1.00 | gnl CDD 30839 COG0493, GltD, NADPH-dependent glutamate synthase beta chain. | 8.00E-32 |
| Magnaporthe_grisea_70-15_supercontig_5.196                                                   | gene_85  | 0.95 | 1.00 | gnl CDD 72839 pfam08583, UPF0287, Uncharacterised protein family (UPF0287). | 1.00E-16 |
| Magnaporthe_grisea_70-15_supercontig_5.196                                                   | gene_86  | 0.83 | 0.85 | gnl CDD 35107 COG5548, COG5548, Small integral membrane protein.            | 9.00E-11 |
| Magnaporthe_grisea_70-15_supercontig_5.196                                                   | gene_88  | 0.57 | 0.41 | gnl CDD 79487 pfam00144, Beta-lactamase, Beta-lactamase.                    | 2.00E-11 |
| Magnaporthe_grisea_70-15_supercontig_5.196                                                   | gene_4   | 0.95 | 0.87 | gnl CDD 68035 pfam04446, Thg1, tRNAHis guanylyltransferase.                 | 3.00E-53 |
| Magnaporthe_grisea_70-15_supercontig_5.196                                                   | gene_168 | 0.56 | 0.47 | gnl CDD 29261 cd00204, ANK, ankyrin repeats; ankyrin repeats mediate        | 1.00E-06 |
| Magnaporthe_grisea_70-15_supercontig_5.196                                                   | gene_188 | 0.57 | 1.00 | gnl CDD 69428 pfam05903, DUF862, PPPDE putative peptidase domain.           | 2.00E-33 |
| AACW02000010_ _CONTIG_10__ _Rhizopus_oryzae_supercontig_3.1_ _[2400983-2598834]_ _197852_nt_ | gene_22  | 0.68 | 1.00 | gnl CDD 30376 COG0026, PurK, Phosphoribosylaminoimidazole carboxylase       | e-113    |
| AACW02000102_ _CONTIG_102__ _Rhizopus_oryzae_supercontig_3.5_ _[154653-488518]_ _333866_nt_  | gene_75  | 0.73 | 0.94 | gnl CDD 72061 pfam08636, Pkr1, ER protein Pkr1.                             | 2.00E-06 |
| AACW02000011_ _CONTIG_11__ _Rhizopus_oryzae_supercontig_3.1_ _[2598935-3032215]_ _433281_nt_ | gene_16  | 0.90 | 1.00 | gnl CDD 30181 cd01994, Alpha_ANH_like_IV                                    | 5.00E-29 |
| AACW02000011_ _CONTIG_11__ _Rhizopus_oryzae_supercontig_3.1_ _[2598935-3032215]_ _433281_nt_ | gene_47  | 0.26 | 0.95 | gnl CDD 47750 smart00443, G_patch, glycine rich nucleic binding domain;     | 1.00E-06 |
| AACW02000011_ _CONTIG_11__ _Rhizopus_oryzae_supercontig_3.1_ _[2598935-3032215]_ _433281_nt_ | gene_111 | 0.91 | 1.00 | gnl CDD 29719 cd01732, LSm5, The eukaryotic Sm and Sm-like (LSm) proteins   | 9.00E-30 |

|                                                                                             |          |      |      |                                                                                   |          |
|---------------------------------------------------------------------------------------------|----------|------|------|-----------------------------------------------------------------------------------|----------|
| AACW02000113_ _CONTIG_113_ _Rhizopus_oryzae_supercontig_3.5_ _[1292705-1448586] _155882_nt_ | gene_44  | 0.97 | 0.96 | gnl CDD 34696 COG5093, COG5093, Uncharacterized conserved protein                 | 1.00E-36 |
| AACW02000116_ _CONTIG_116_ _Rhizopus_oryzae_supercontig_3.5_ _[1648264-1804041] _155778_nt_ | gene_53  | 0.55 | 0.82 | gnl CDD 79643 pfam00583, Acetyltransf_1, Acetyltransferase (GNAT) family.         | 2.00E-07 |
| AACW02000117_ _CONTIG_117_ _Rhizopus_oryzae_supercontig_3.5_ _[1804142-1926323] _122182_nt_ | gene_12  | 0.38 | 0.98 | gnl CDD 68297 pfam04719, TAFII28, hTAFII28-like conserved region.                 | 9.00E-27 |
| AACW02000121_ _CONTIG_121_ _Rhizopus_oryzae_supercontig_3.5_ _[2206362-2288780] _82419_nt_  | gene_7   | 0.97 | 1.00 | gnl CDD 34827 COG5230, COG5230, Uncharacterized conserved protein                 | 9.00E-31 |
| AACW02000121_ _CONTIG_121_ _Rhizopus_oryzae_supercontig_3.5_ _[2206362-2288780] _82419_nt_  | gene_21  | 0.16 | 0.95 | gnl CDD 32274 COG2091, Sfp, Phosphopantetheinyl transferase                       | 2.00E-24 |
| AACW02000143_ _CONTIG_143_ _Rhizopus_oryzae_supercontig_3.6_ _[362262-593047] _230786_nt_   | gene_54  | 0.86 | 1.00 | gnl CDD 79999 pfam03372, Exo_endo_phos, Endonuclease/Exonuclease/phosphatase      | 5.00E-14 |
| AACW02000143_ _CONTIG_143_ _Rhizopus_oryzae_supercontig_3.6_ _[362262-593047] _230786_nt_   | gene_57  | 0.78 | 0.99 | gnl CDD 71649 pfam08215, DUF1715, Eukaryotic domain of unknown function           | 8.00E-15 |
| AACW02000144_ _CONTIG_144_ _Rhizopus_oryzae_supercontig_3.6_ _[593148-906311] _313164_nt_   | gene_49  | 0.96 | 1.00 | gnl CDD 33417 COG3618, COG3618, Predicted metal-dependent hydrolase               | 2.00E-38 |
| AACW02000157_ _CONTIG_157_ _Rhizopus_oryzae_supercontig_3.6_ _[2522494-2859520] _337027_nt_ | gene_16  | 0.29 | 0.92 | gnl CDD 29006 cd02396, PCBP_like_KH, K homology RNA-binding domain, PCBP_like.    | 2.00E-06 |
| AACW02000166_ _CONTIG_166_ _Rhizopus_oryzae_supercontig_3.7_ _[471419-758678] _287260_nt_   | gene_72  | 0.96 | 1.00 | gnl CDD 72167 pfam08743, Nse4, Nse4. Nse4 is a component of the Smc5/6 DNA repair | 2.00E-53 |
| AACW02000173_ _CONTIG_173_ _Rhizopus_oryzae_supercontig_3.7_ _[1109583-1767534] _657952_nt_ | gene_238 | 0.86 | 0.98 | gnl CDD 33461 COG3663, Mug, G:T/U mismatch-specific DNA glycosylase               | 2.00E-19 |

|                                                                                              |          |      |      |                                                                                 |          |
|----------------------------------------------------------------------------------------------|----------|------|------|---------------------------------------------------------------------------------|----------|
| AACW02000194_ _CONTIG_194_ _Rhizopus_oryzae_supercontig_3.8_ _[1456944-1811534] _354591_nt_  | gene_96  | 0.87 | 1.00 | gnl CDD 32648 COG2820, Udp, Uridine phosphorylase [Nucleotide transport and     | 6.00E-19 |
| AACW02000198_ _CONTIG_198_ _Rhizopus_oryzae_supercontig_3.8_ _[2139510-2362744] _223235_nt_  | gene_27  | 0.60 | 0.34 | gnl CDD 79137 PRK12678, PRK12678, transcription termination factor Rho.         | 3.00E-09 |
| AACW02000210_ _CONTIG_210_ _Rhizopus_oryzae_supercontig_3.9_ _[1865000-2296105] _431106_nt_  | gene_22  | 0.95 | 0.98 | gnl CDD 78584 PRK11587, PRK11587, putative phosphatase.                         | 2.00E-36 |
| AACW02000216_ _CONTIG_216_ _Rhizopus_oryzae_supercontig_3.10_ _[335899-760890] _424992_nt_   | gene_23  | 0.39 | 0.81 | gnl CDD 29705 cd01718, Sm_E, The eukaryotic Sm and Sm-like (LSm) proteins       | 2.00E-25 |
| AACW02000216_ _CONTIG_216_ _Rhizopus_oryzae_supercontig_3.10_ _[335899-760890] _424992_nt_   | gene_151 | 0.84 | 0.88 | gnl CDD 31007 COG0663, PaaY, Carbonic anhydrases/acetyltransferases, isoleucine | 7.00E-16 |
| AACW02000219_ _CONTIG_219_ _Rhizopus_oryzae_supercontig_3.10_ _[1035221-1305776] _270556_nt_ | gene_68  | 0.28 | 0.92 | gnl CDD 67722 pfam04117, Mpv17_PMP22, Mpv17 / PMP22 family.                     | 7.00E-12 |
| AACW02000219_ _CONTIG_219_ _Rhizopus_oryzae_supercontig_3.10_ _[1035221-1305776] _270556_nt_ | gene_72  | 0.72 | 0.76 | gnl CDD 68849 pfam05292, MCD, Malonyl-CoA decarboxylase (MCD).                  | 2.00E-32 |
| AACW02000228_ _CONTIG_228_ _Rhizopus_oryzae_supercontig_3.11_ _[1-736642] _736642_nt_        | gene_154 | 0.53 | 0.76 | gnl CDD 34689 COG5085, COG5085, Predicted membrane protein.                     | 3.00E-19 |
| AACW02000023_ _CONTIG_23_ _Rhizopus_oryzae_supercontig_3.1_ _[3465973-3499457] _33485_nt_    | gene_5   | 0.57 | 1.00 | gnl CDD 69614 pfam06102, DUF947, Domain of unknown function (DUF947).           | 2.00E-11 |
| AACW02000233_ _CONTIG_233_ _Rhizopus_oryzae_supercontig_3.11_ _[789332-930552] _141221_nt_   | gene_33  | 0.41 | 0.82 | gnl CDD 30935 COG0590, CumB, Cytosine/adenosine deaminases.                     | 1.00E-17 |
| AACW02000235_ _CONTIG_235_ _Rhizopus_oryzae_supercontig_3.11_ _[934731-1439178] _504448_nt_  | gene_92  | 0.98 | 0.91 | gnl CDD 34622 COG5017, COG5017, Uncharacterized conserved protein.              | 1.00E-13 |
| AACW02000235_ _CONTIG_235_ _Rhizopus_oryzae_supercontig_3.11_ _[934731-1439178] _504448_nt_  | gene_118 | 0.95 | 1.00 | gnl CDD 29161 cd00754, Moad, Moad family.                                       | 6.00E-14 |

|                                                                                               |          |      |      |                                                                            |          |
|-----------------------------------------------------------------------------------------------|----------|------|------|----------------------------------------------------------------------------|----------|
| AACW02000235_ _CONTIG_235_ _Rhizopus_oryzae_supercontig_3.11_ _[934731-1439178]_ _504448_nt_  | gene_147 | 0.76 | 0.95 | gnl CDD 34813 COG5216, COG5216, Uncharacterized conserved protein.         | 3.00E-18 |
| AACW02000235_ _CONTIG_235_ _Rhizopus_oryzae_supercontig_3.11_ _[934731-1439178]_ _504448_nt_  | gene_171 | 0.17 | 1.00 | gnl CDD 72053 pfam08628, Nexin_C, Sorting nexin C terminal.                | 2.00E-07 |
| AACW02000239_ _CONTIG_239_ _Rhizopus_oryzae_supercontig_3.11_ _[1471025-1585522]_ _114498_nt_ | gene_25  | 0.65 | 1.00 | gnl CDD 72882 cd03424, ADPRase_NUDT5, ADP-ribose pyrophosphatase (ADPRase) | 5.00E-15 |
| AACW02000250_ _CONTIG_250_ _Rhizopus_oryzae_supercontig_3.12_ _[473879-1120864]_ _646986_nt_  | gene_8   | 0.59 | 0.40 | gnl CDD 68494 pfam04922, DIE2_ALG10, DIE2/ALG10 family.                    | 3.00E-26 |
| AACW02000250_ _CONTIG_250_ _Rhizopus_oryzae_supercontig_3.12_ _[473879-1120864]_ _646986_nt_  | gene_80  | 1.00 | 1.00 | gnl CDD 67275 pfam03647, TMEM14, Transmembrane proteins 14C.               | 4.00E-11 |
| AACW02000250_ _CONTIG_250_ _Rhizopus_oryzae_supercontig_3.12_ _[473879-1120864]_ _646986_nt_  | gene_142 | 0.77 | 0.79 | gnl CDD 70129 pfam06645, SPC12, Microsomal signal peptidase 12 kDa subunit | 1.00E-11 |
| AACW02000250_ _CONTIG_250_ _Rhizopus_oryzae_supercontig_3.12_ _[473879-1120864]_ _646986_nt_  | gene_218 | 0.97 | 1.00 | gnl CDD 68156 pfam04573, SPC22, Signal peptidase subunit.                  | 4.00E-28 |
| AACW02000253_ _CONTIG_253_ _Rhizopus_oryzae_supercontig_3.12_ _[1241831-1398439]_ _156609_nt_ | gene_25  | 0.71 | 1.00 | gnl CDD 47999 smart00731, SprT, SprT homologues.                           | 9.00E-21 |
| AACW02000257_ _CONTIG_257_ _Rhizopus_oryzae_supercontig_3.13_ _[7284-135576]_ _128293_nt_     | gene_32  | 0.88 | 0.90 | gnl CDD 68801 pfam05241, EBP, Emopamil binding protein.                    | 1.00E-26 |
| AACW02000268_ _CONTIG_268_ _Rhizopus_oryzae_supercontig_3.14_ _[586241-956944]_ _370704_nt_   | gene_6   | 0.55 | 1.00 | gnl CDD 79643 pfam00583, Acetyltransf_1, Acetyltransferase (GNAT) family.  | 1.00E-14 |
| AACW02000268_ _CONTIG_268_ _Rhizopus_oryzae_supercontig_3.14_ _[586241-956944]_ _370704_nt_   | gene_130 | 0.56 | 0.58 | gnl CDD 35095 COG5536, BET4, Protein prenyltransferase, alpha subunit      | 1.00E-08 |
| AACW02000274_ _CONTIG_274_ _Rhizopus_oryzae_supercontig_3.15_ _[1-410886]_ _410886_nt_        | gene_112 | 0.83 | 0.82 | gnl CDD 70180 pfam06699, PIG-F, Phospho-ethanolamine N-methyltransferase.  | 1.00E-18 |

|                                                                                            |          |      |      |                                                                                 |          |
|--------------------------------------------------------------------------------------------|----------|------|------|---------------------------------------------------------------------------------|----------|
| AACW02000275_ _CONTIG_275_ _Rhizopus_oryzae_supercontig_3.15_ _[415307-518953] _103647_nt_ | gene_4   | 0.46 | 0.56 | gnl CDD 30003 cd01393, recA_like, RecA is a bacterial enzyme which has roles in | 1.00E-07 |
| AACW02000279_ _CONTIG_279_ _Rhizopus_oryzae_supercontig_3.15_ _[570083-942547] _372465_nt_ | gene_3   | 0.93 | 0.94 | gnl CDD 69821 pfam06320, GCN5L1, GCN5-like protein 1 (GCN5L1).                  | 1.00E-20 |
| AACW02000279_ _CONTIG_279_ _Rhizopus_oryzae_supercontig_3.15_ _[570083-942547] _372465_nt_ | gene_41  | 0.35 | 0.80 | gnl CDD 64946 pfam01111, CKS, Cyclin-dependent kinase regulatory subunit.       | 2.00E-17 |
| AACW02000288_ _CONTIG_288_ _Rhizopus_oryzae_supercontig_3.16_ _[333133-673130] _339998_nt_ | gene_70  | 0.44 | 0.36 | gnl CDD 34689 COG5085, COG5085, Predicted membrane protein.                     | 2.00E-12 |
| AACW02000293_ _CONTIG_293_ _Rhizopus_oryzae_supercontig_3.17_ _[1-476381] _476381_nt_      | gene_49  | 0.81 | 0.65 | gnl CDD 68305 pfam04727, ELMO_CED12, ELMO/CED-12 family.                        | 2.00E-26 |
| AACW02000293_ _CONTIG_293_ _Rhizopus_oryzae_supercontig_3.17_ _[1-476381] _476381_nt_      | gene_62  | 0.22 | 0.97 | gnl CDD 65389 pfam01585, G-patch, G-patch domain.                               | 1.00E-06 |
| AACW02000293_ _CONTIG_293_ _Rhizopus_oryzae_supercontig_3.17_ _[1-476381] _476381_nt_      | gene_168 | 0.81 | 1.00 | gnl CDD 29769 cd01042, DMQH, Demethoxyubiquinone hydroxylases (DMQH).           | 5.00E-55 |
| AACW02000003_ _CONTIG_3_ _Rhizopus_oryzae_supercontig_3.1_ _[346323-756733] _410411_nt_    | gene_127 | 0.64 | 0.62 | gnl CDD 71935 pfam08507, COPI_assoc, COPI associated protein.                   | 4.00E-07 |
| AACW02000311_ _CONTIG_311_ _Rhizopus_oryzae_supercontig_3.20_ _[152419-490205] _337787_nt_ | gene_38  | 0.85 | 0.64 | gnl CDD 58647 cd00756, MoeA, MoeA family.                                       | 3.00E-21 |
| AACW02000313_ _CONTIG_313_ _Rhizopus_oryzae_supercontig_3.21_ _[1-398826] _398826_nt_      | gene_66  | 0.95 | 1.00 | gnl CDD 66475 pfam02792, Mago_nashi.                                            | 4.00E-59 |
| AACW02000327_ _CONTIG_327_ _Rhizopus_oryzae_supercontig_3.25_ _[83094-182798] _99705_nt_   | gene_29  | 1.00 | 1.00 | gnl CDD 30755 COG0406, GpmB, Fructose-2,6-bisphosphatase.                       | 8.00E-19 |
| AACW02000034_ _CONTIG_34_ _Rhizopus_oryzae_supercontig_3.1_ _[4377654-4477405] _99752_nt_  | gene_12  | 0.70 | 0.91 | gnl CDD 30638 COG0290, InfC, Translation initiation factor 3 (IF-3)             | 3.00E-15 |
| AACW02000004_ _CONTIG_4_ _Rhizopus_oryzae_supercontig_3.1_ _[757263-1437475] _680213_nt_   | gene_89  | 0.85 | 0.94 | gnl CDD 69205 pfam05669, SOH1, SOH1. The family consists of Saccharomyces       | 6.00E-27 |

|                                                                                                 |          |      |      |                                                                                         |          |
|-------------------------------------------------------------------------------------------------|----------|------|------|-----------------------------------------------------------------------------------------|----------|
| AACW02000041_ _CONTIG_41_ _Rhizopus_oryzae_supercontig_3<br>.1_ _[5061334-5735491]_ _674158_nt_ | gene_181 | 0.59 | 0.96 | gnl CDD 69362 pfam05832,<br>DUF846, Eukaryotic protein of<br>unknown function (DUF846). | 2.00E-42 |
| AACW02000042_ _CONTIG_42_ _Rhizopus_oryzae_supercontig_3<br>.2_ _[1-107275]_ _107275_nt_        | gene_11  | 0.38 | 0.92 | gnl CDD 68989 pfam05439, JTB,<br>Jumping translocation breakpoint<br>protein (JTB).     | 2.00E-06 |
| AACW02000056_ _CONTIG_56_ _Rhizopus_oryzae_supercontig_3<br>.2_ _[1578995-2467034]_ _888040_nt_ | gene_317 | 0.76 | 0.79 | gnl CDD 69216 pfam05680, ATP-<br>synt_E, ATP synthase E chain.                          | 5.00E-10 |
| AACW02000006_ _CONTIG_6_ _Rhizopus_oryzae_supercontig_3.<br>1_ _[1509808-1953412]_ _443605_nt_  | gene_42  | 0.96 | 1.00 | gnl CDD 68587 pfam05018,<br>DUF667, Protein of unknown<br>function (DUF667).            | 8.00E-73 |
| AACW02000062_ _CONTIG_62_ _Rhizopus_oryzae_supercontig_3<br>.2_ _[3248533-3874699]_ _626167_nt_ | gene_132 | 0.98 | 1.00 | gnl CDD 32279 COG2096,<br>COG2096, Uncharacterized<br>conserved protein.                | 5.00E-44 |
| AACW02000062_ _CONTIG_62_ _Rhizopus_oryzae_supercontig_3<br>.2_ _[3248533-3874699]_ _626167_nt_ | gene_158 | 0.86 | 1.00 | gnl CDD 72839 pfam08583,<br>UPF0287, Uncharacterised<br>protein family (UPF0287).       | 3.00E-12 |
| AACW02000073_ _CONTIG_73_ _Rhizopus_oryzae_supercontig_3<br>.3_ _[601433-1277658]_ _676226_nt_  | gene_193 | 0.96 | 1.00 | gnl CDD 80120 pfam05721,<br>PhyH, Phytanoyl-CoA<br>dioxygenase (PhyH).                  | 1.00E-11 |
| AACW02000074_ _CONTIG_74_ _Rhizopus_oryzae_supercontig_3<br>.3_ _[1277853-1721144]_ _443292_nt_ | gene_59  | 0.21 | 1.00 | gnl CDD 29102 cd00162, RING,<br>RING-finger (Really Interesting<br>New Gene).           | 3.00E-07 |
| AACW02000075_ _CONTIG_75_ _Rhizopus_oryzae_supercontig_3<br>.3_ _[1721245-2450281]_ _729037_nt_ | gene_3   | 0.21 | 0.94 | gnl CDD 71421 pfam07985,<br>SRR1, SRR1.                                                 | 3.00E-08 |
| AACW02000078_ _CONTIG_78_ _Rhizopus_oryzae_supercontig_3<br>.3_ _[2477588-2558442]_ _80855_nt_  | gene_36  | 1.00 | 1.00 | gnl CDD 67669 pfam04062, P21-<br>Arc, P21-ARC (ARP2/3 complex<br>21 kDa subunit).       | 2.00E-56 |
| AACW02000082_ _CONTIG_82_ _Rhizopus_oryzae_supercontig_3<br>.3_ _[2888016-2926936]_ _38921_nt_  | gene_3   | 1.00 | 1.00 | gnl CDD 67291 pfam03665,<br>UPF0172, Uncharacterised<br>protein family (UPF0172).       | 1.00E-37 |
| AACW02000083_ _CONTIG_83_ _Rhizopus_oryzae_supercontig_3<br>.3_ _[2928881-3133860]_ _204980_nt_ | gene_45  | 0.87 | 0.61 | gnl CDD 34689 COG5085,<br>COG5085, Predicted membrane<br>protein.                       | 6.00E-12 |



|                                                                                                  |          |      |      |                                                                                       |          |
|--------------------------------------------------------------------------------------------------|----------|------|------|---------------------------------------------------------------------------------------|----------|
| AACW02000009_ _CONTIG_9__ _Rhizopus_oryzae_supercontig_3.<br>1_ _[2111367-2400882]_ _289516_nt_  | gene_99  | 0.47 | 0.96 | gnl CDD 32314 COG2131,<br>ComEB, Deoxycytidylate<br>deaminase.                        | 1.00E-34 |
| AACW02000091_ _CONTIG_91__ _Rhizopus_oryzae_supercontig_3<br>.4_ _[1507490-2469713]_ _962224_nt_ | gene_143 | 0.81 | 0.95 | gnl CDD 71948 pfam08520,<br>DUF1748, Fungal protein of<br>unknown function (DUF1748). | 5.00E-18 |
| AACW02000091_ _CONTIG_91__ _Rhizopus_oryzae_supercontig_3<br>.4_ _[1507490-2469713]_ _962224_nt_ | gene_191 | 0.47 | 0.82 | gnl CDD 58521 cd01846,<br>fatty_acyltransferase_like.                                 | 2.00E-23 |
